# Supplementary material for: Synthesis and Relaxivity Studies of a DOTA-Based Nanomolecular Chelator Assembly Supported by an Icosahedral Closo-B122− -Core for MRI: A Click Chemistry Approach
Source: PubMed Central journal article supplement (PMC6270972; doi:10.3390/molecules18089034), 2013-07-29

# Synthesis and Relaxivity Studies of a DOTA-based Nanomolecular Chelator Assembly Supported by an Icosahedral *Closo*-B<sub>12</sub><sup>2-</sup>-Core for MRI: A Click Chemistry Approach

**Lalit N. Goswami, Lixin Ma, Peter J. Kueffer, Satish S. Jalisatgi and M. Frederick Hawthorne\***

International Institute of Nano and Molecular Medicine, School of Medicine, University of Missouri, Columbia, Missouri 65211-3450

\*Author to whom correspondence should be address; Email: [hawthornem@missouri.edu](mailto:hawthornem@missouri.edu);  
Tel.: 001-573-882-7016; Fax: 001-573-884-6900.

## Supporting Information (SI)

|                                                                    |       |
|--------------------------------------------------------------------|-------|
| <sup>1</sup> H, <sup>13</sup> C, <sup>11</sup> B NMR, HRMS Spectra | 2-26  |
| IR spectra of closomer <b>4</b> , <b>11</b> and <b>CA-1</b>        | 27-29 |
| Determination of hydration number (q)                              | 30    |
| Comparison of relaxivity                                           | 31    |
| Dynamic Light Scattering Analysis of <b>CA-1</b>                   | 32    |
| HPLC analysis of <b>CA-1</b>                                       | 33    |

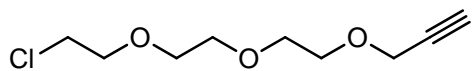

5

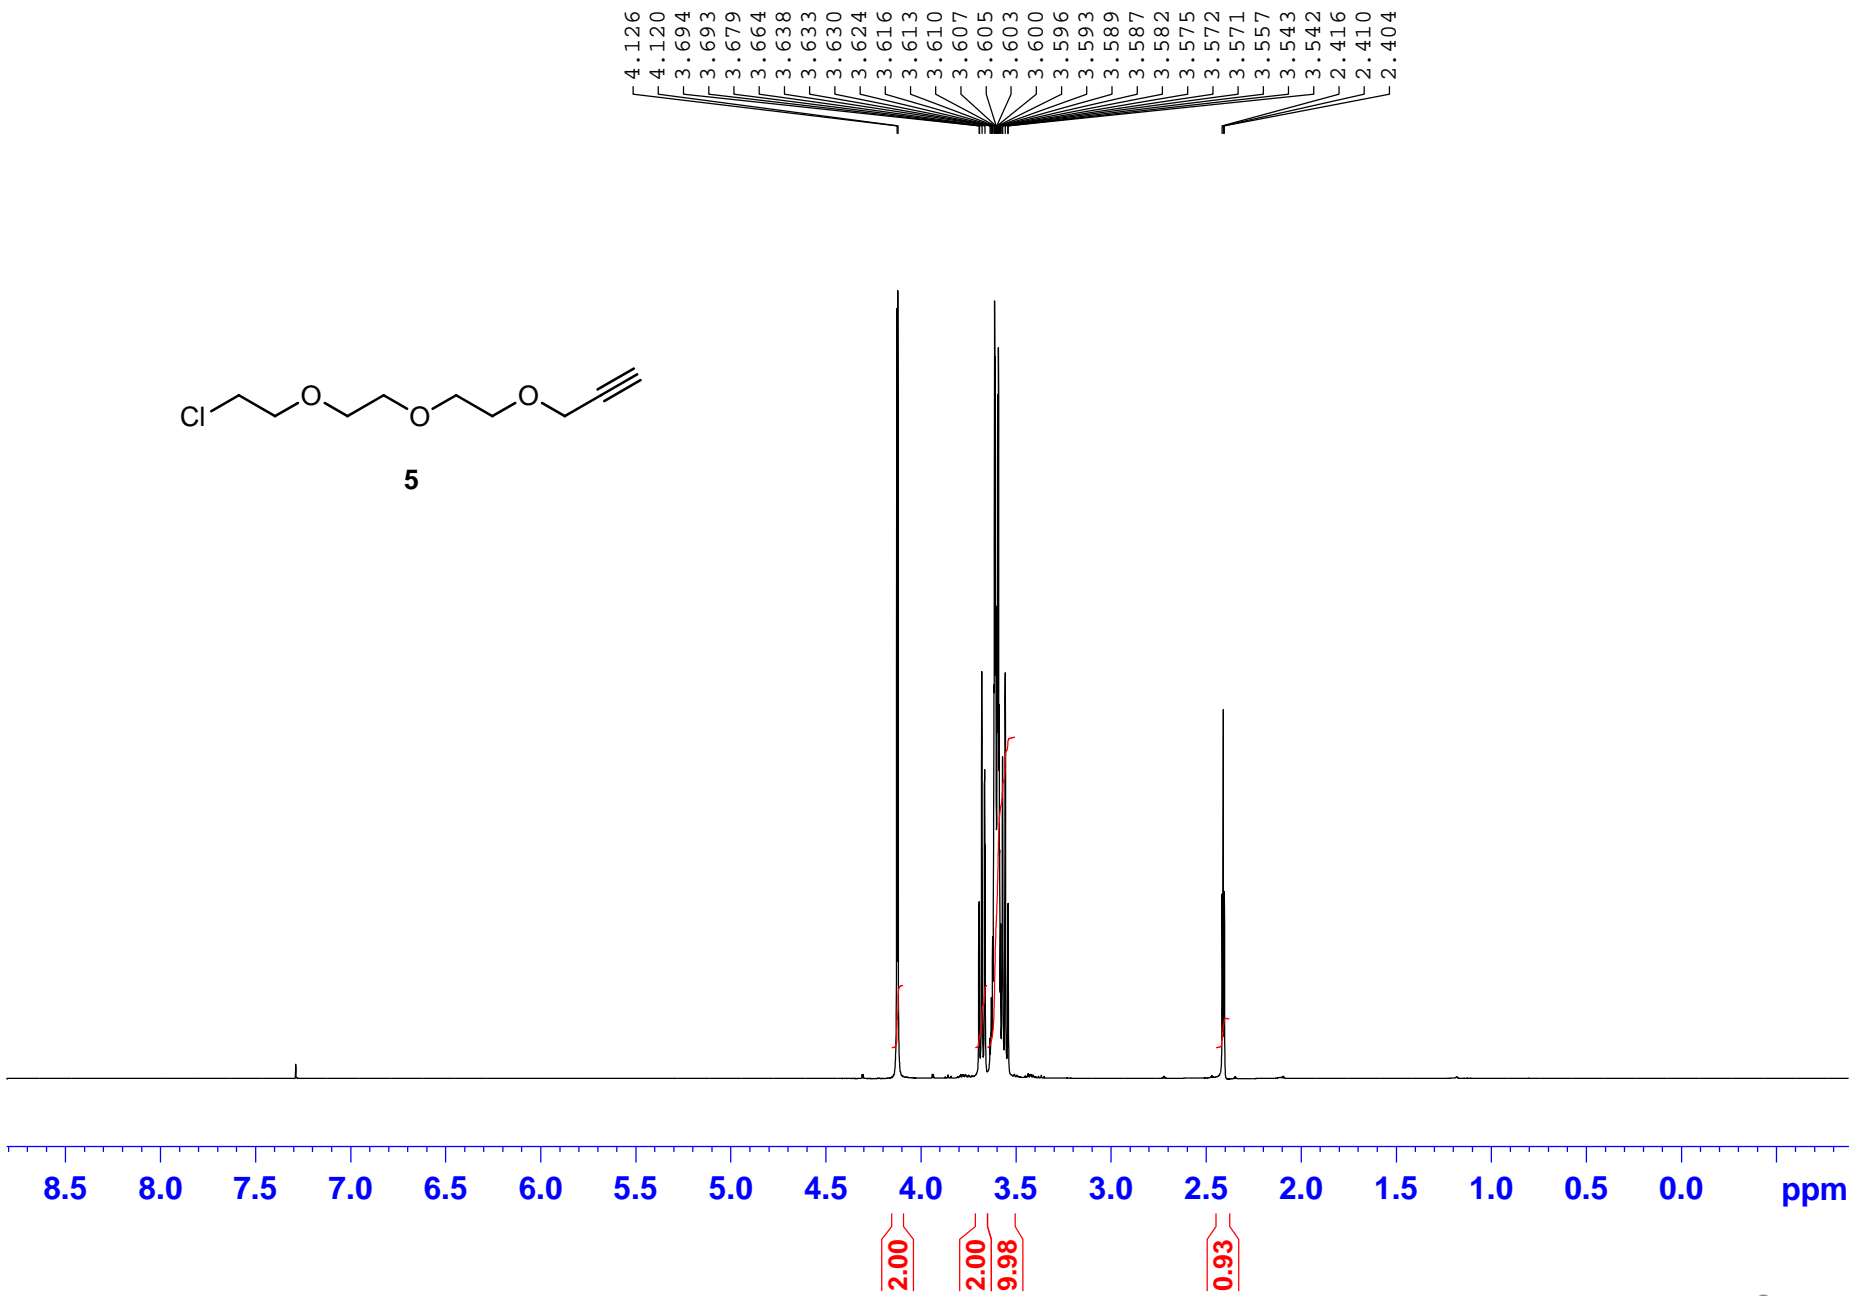



5

80.439  
78.378  
78.058  
77.739  
75.389  
72.063  
71.343  
71.319  
71.167  
71.125  
69.818  
59.075  
— 43.492

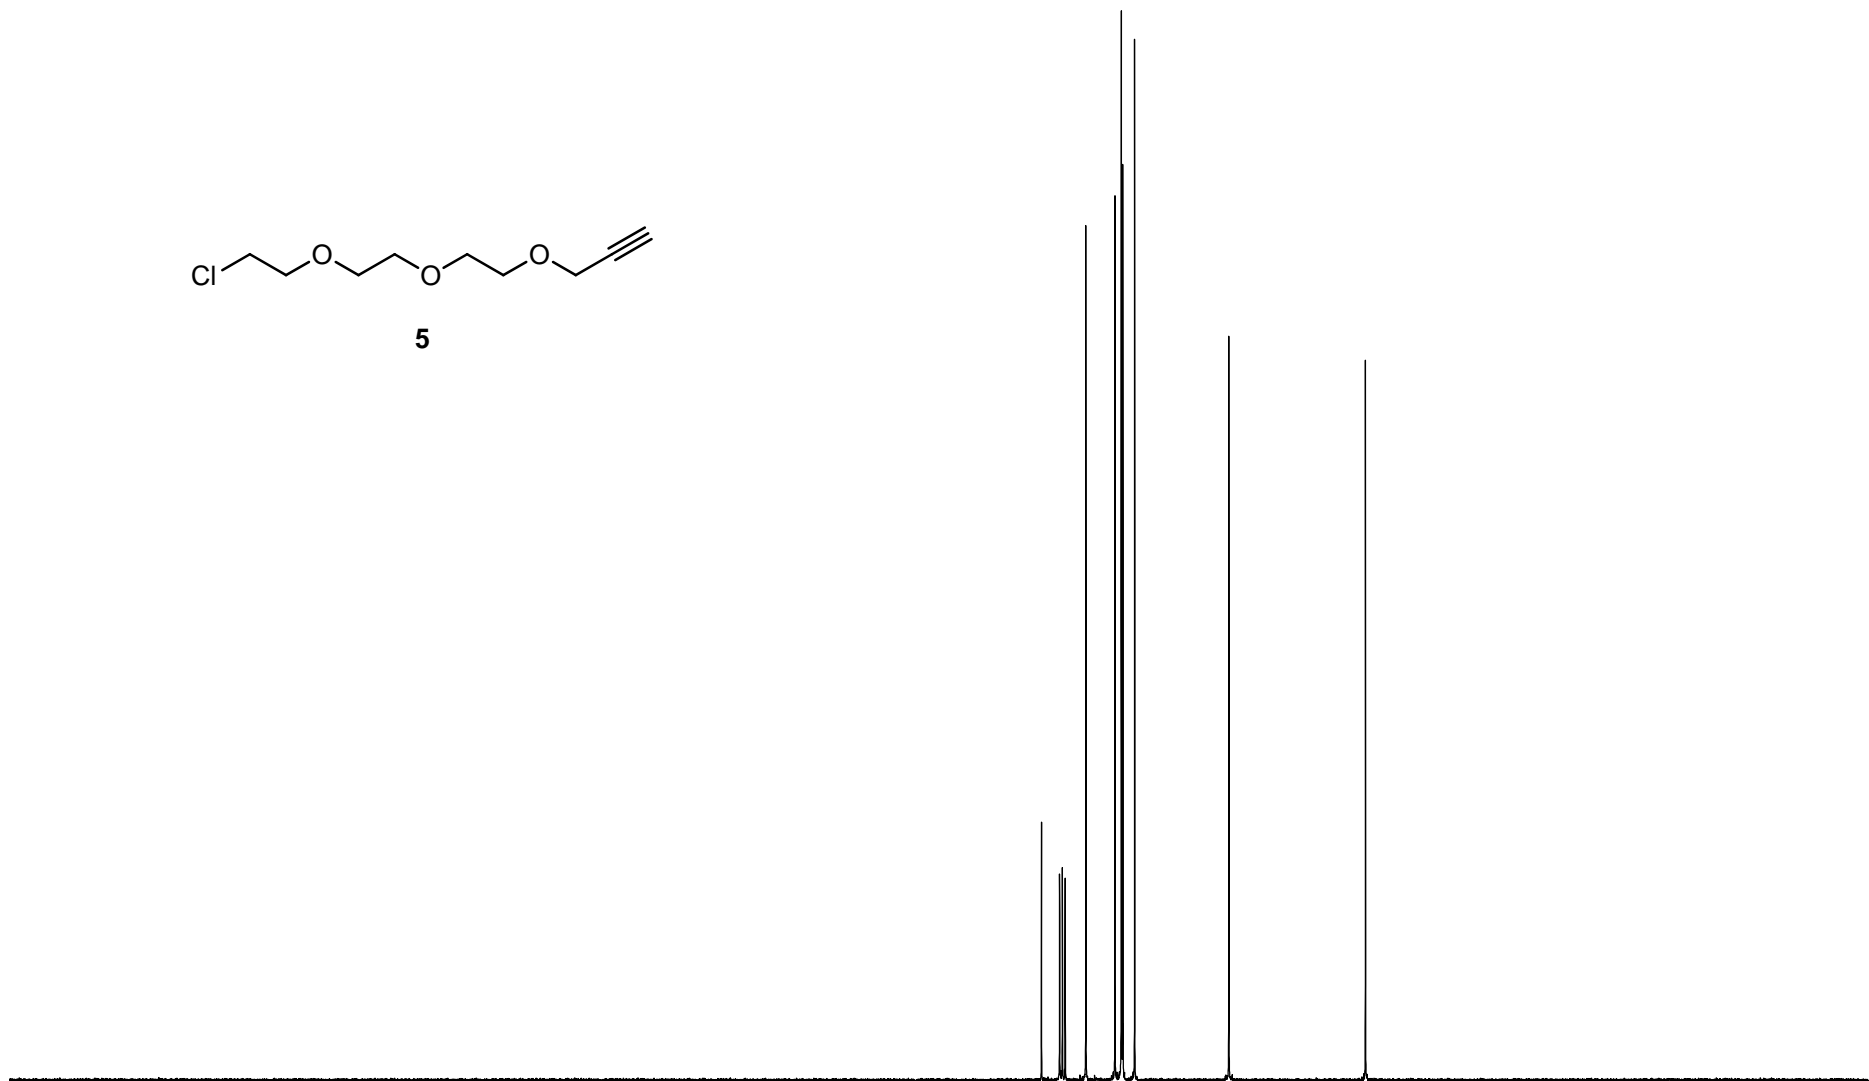

190 180 170 160 150 140 130 120 110 100 90 80 70 60 50 40 30 20 10 0 ppm

# Applied Biosystems Mariner System 5268

Mariner Spec /1:32 ASC[BP = 229.0, 2233]

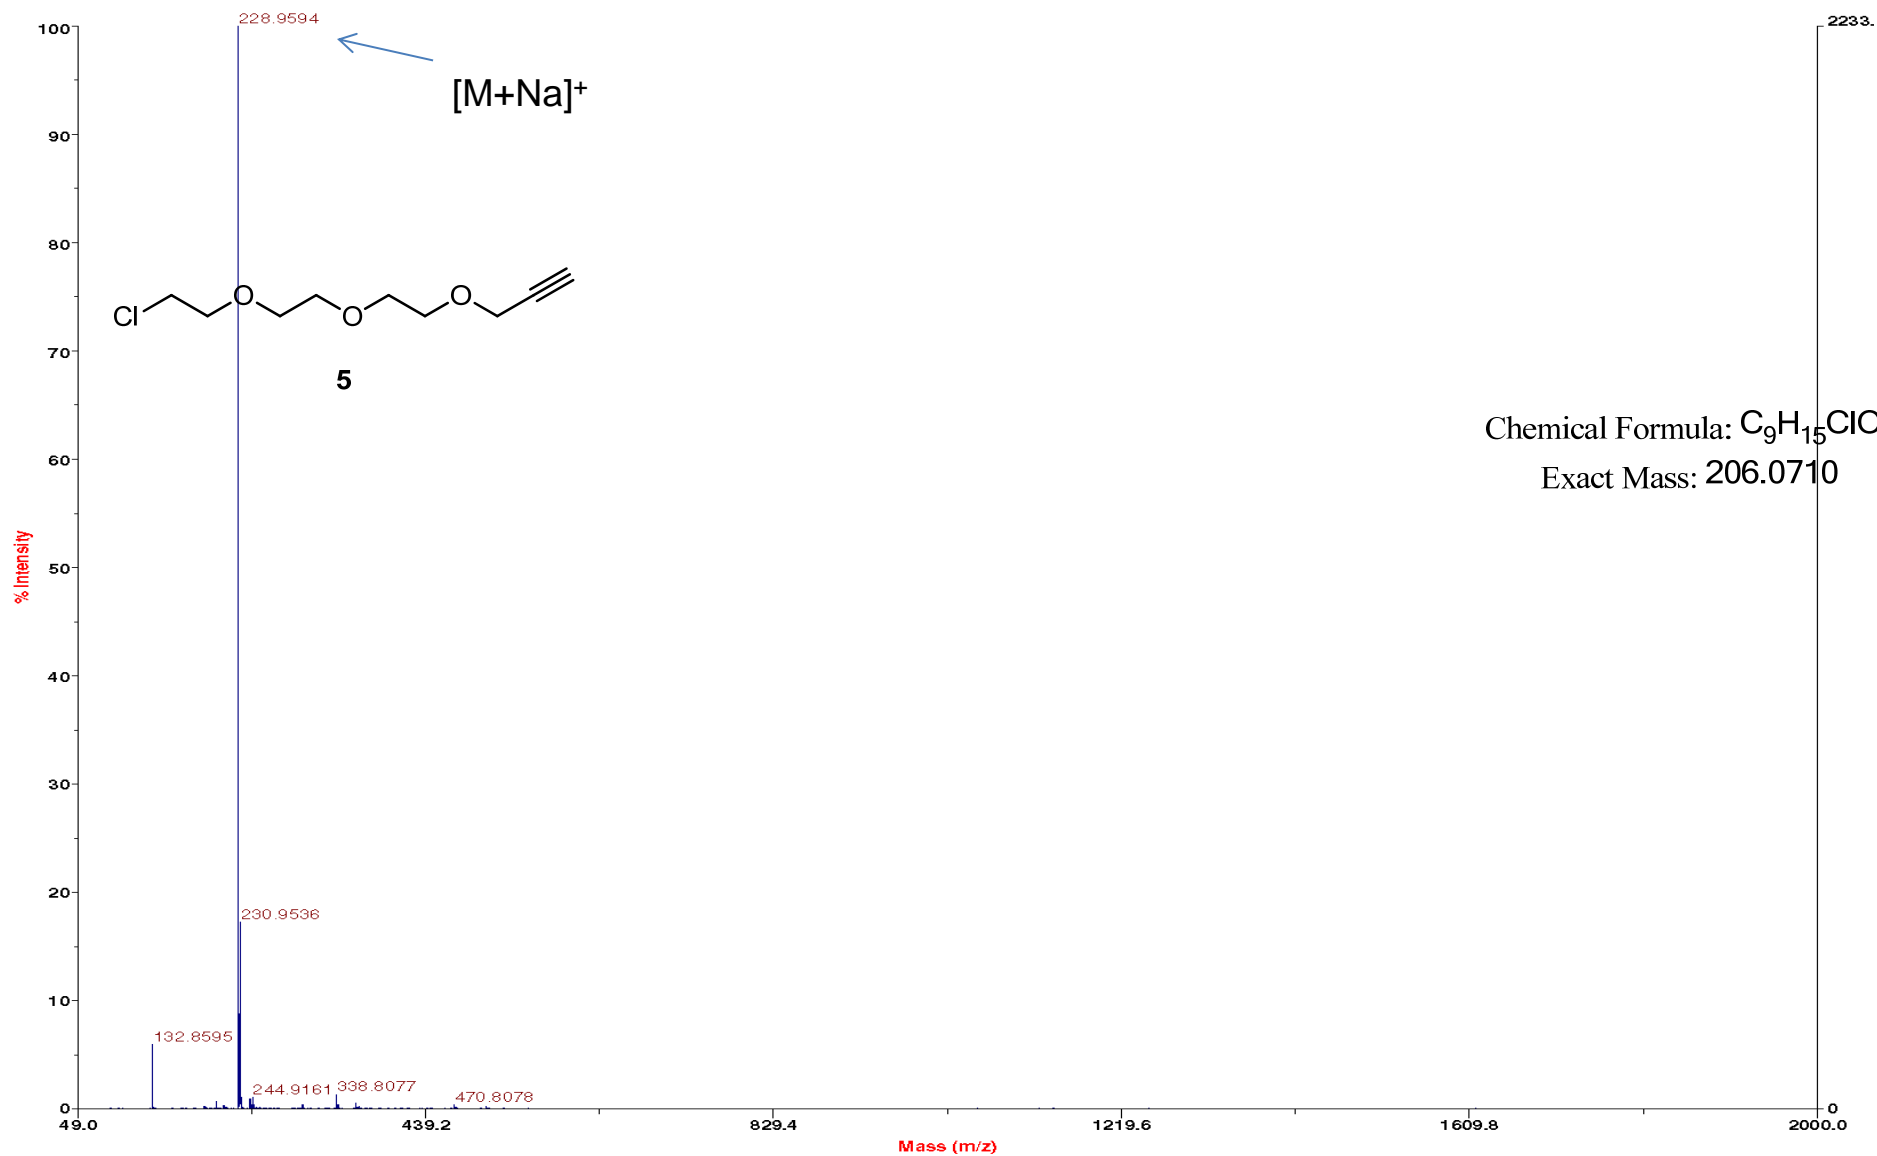

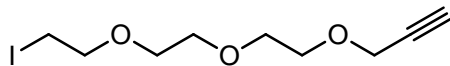

6

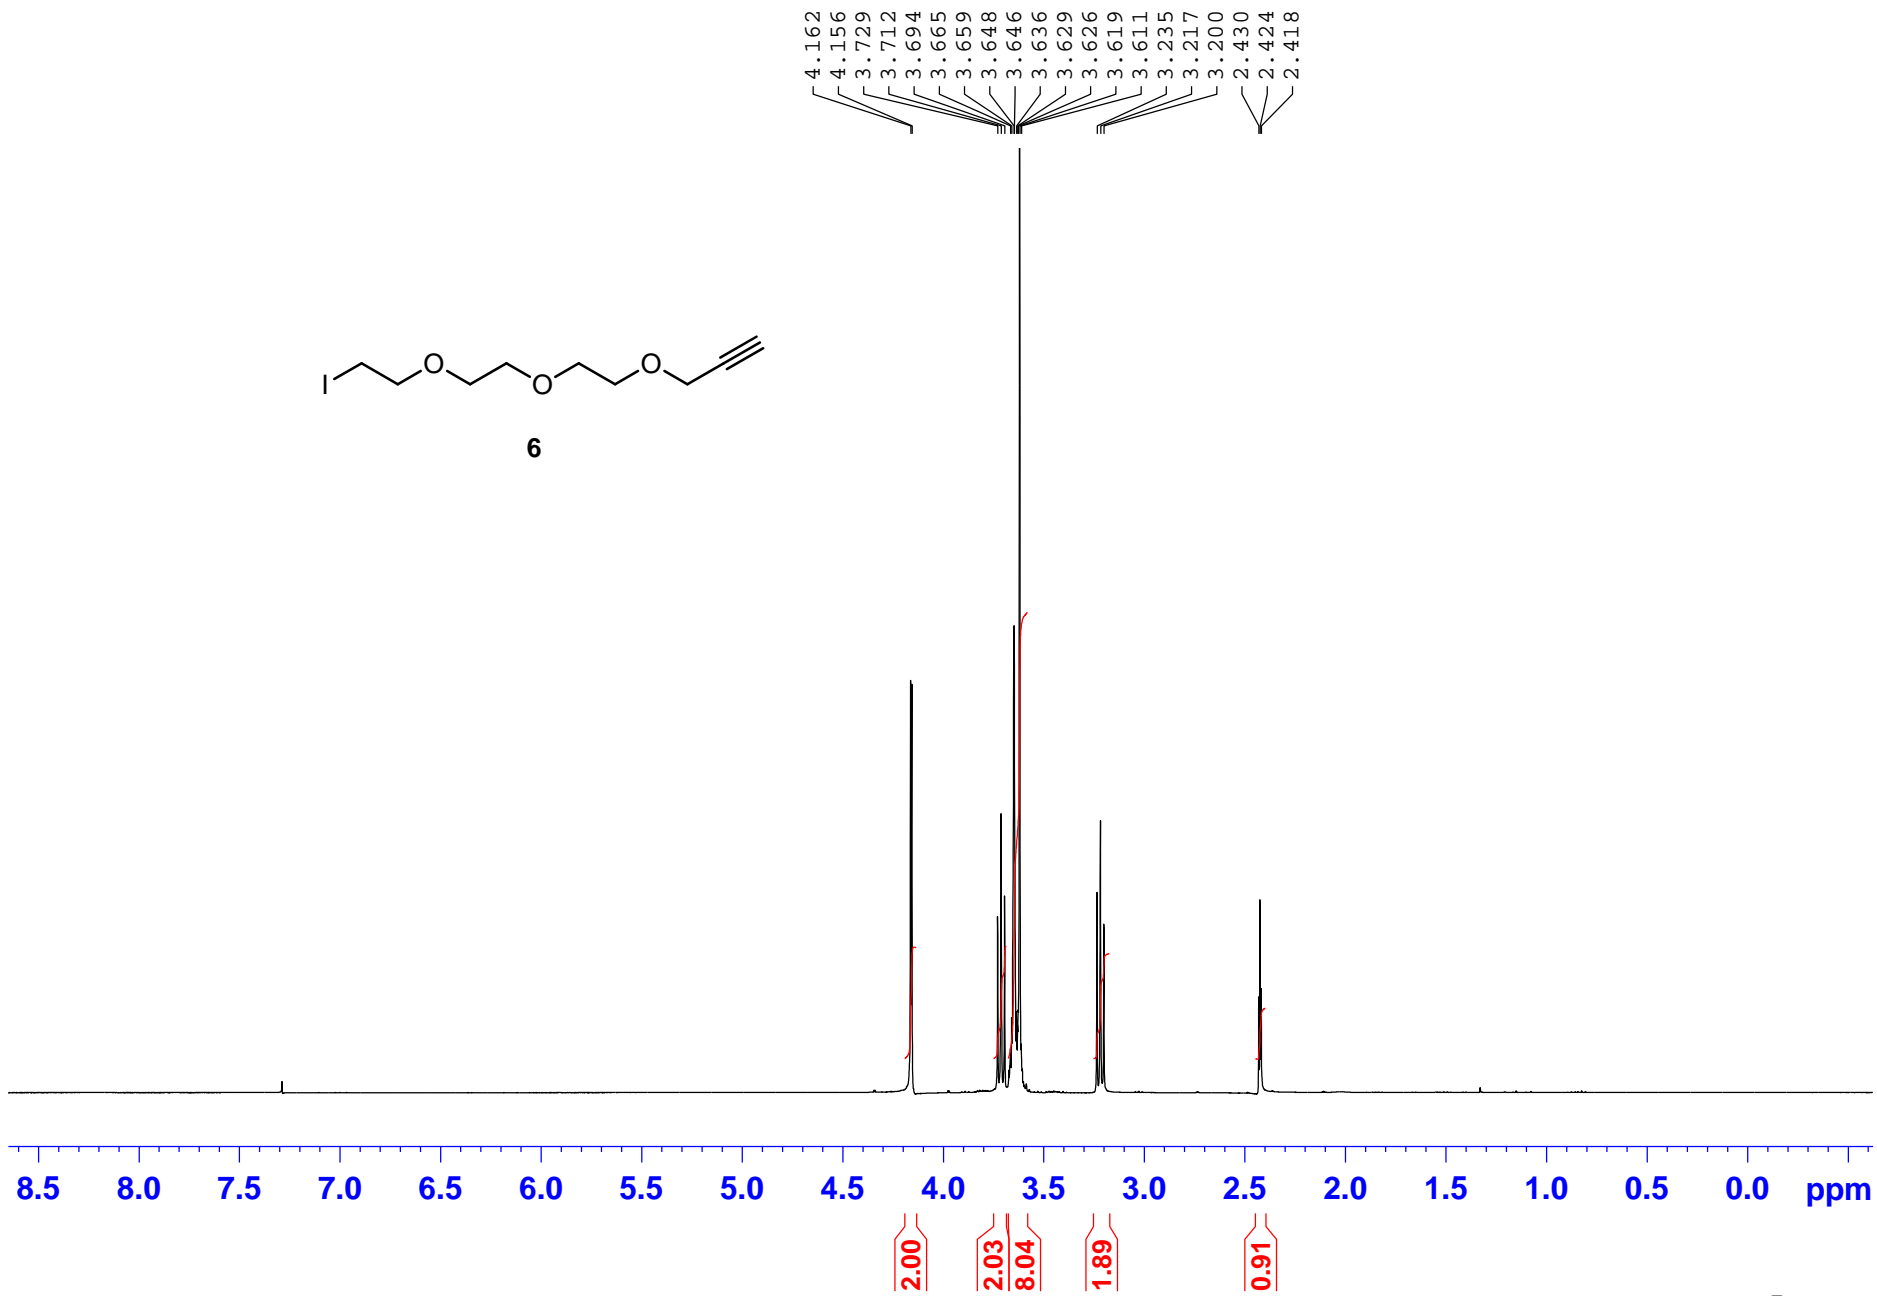



# Applied Biosystems Mariner System 5268

Mariner Spec /1:32 ASC[BP = 321.0, 266]

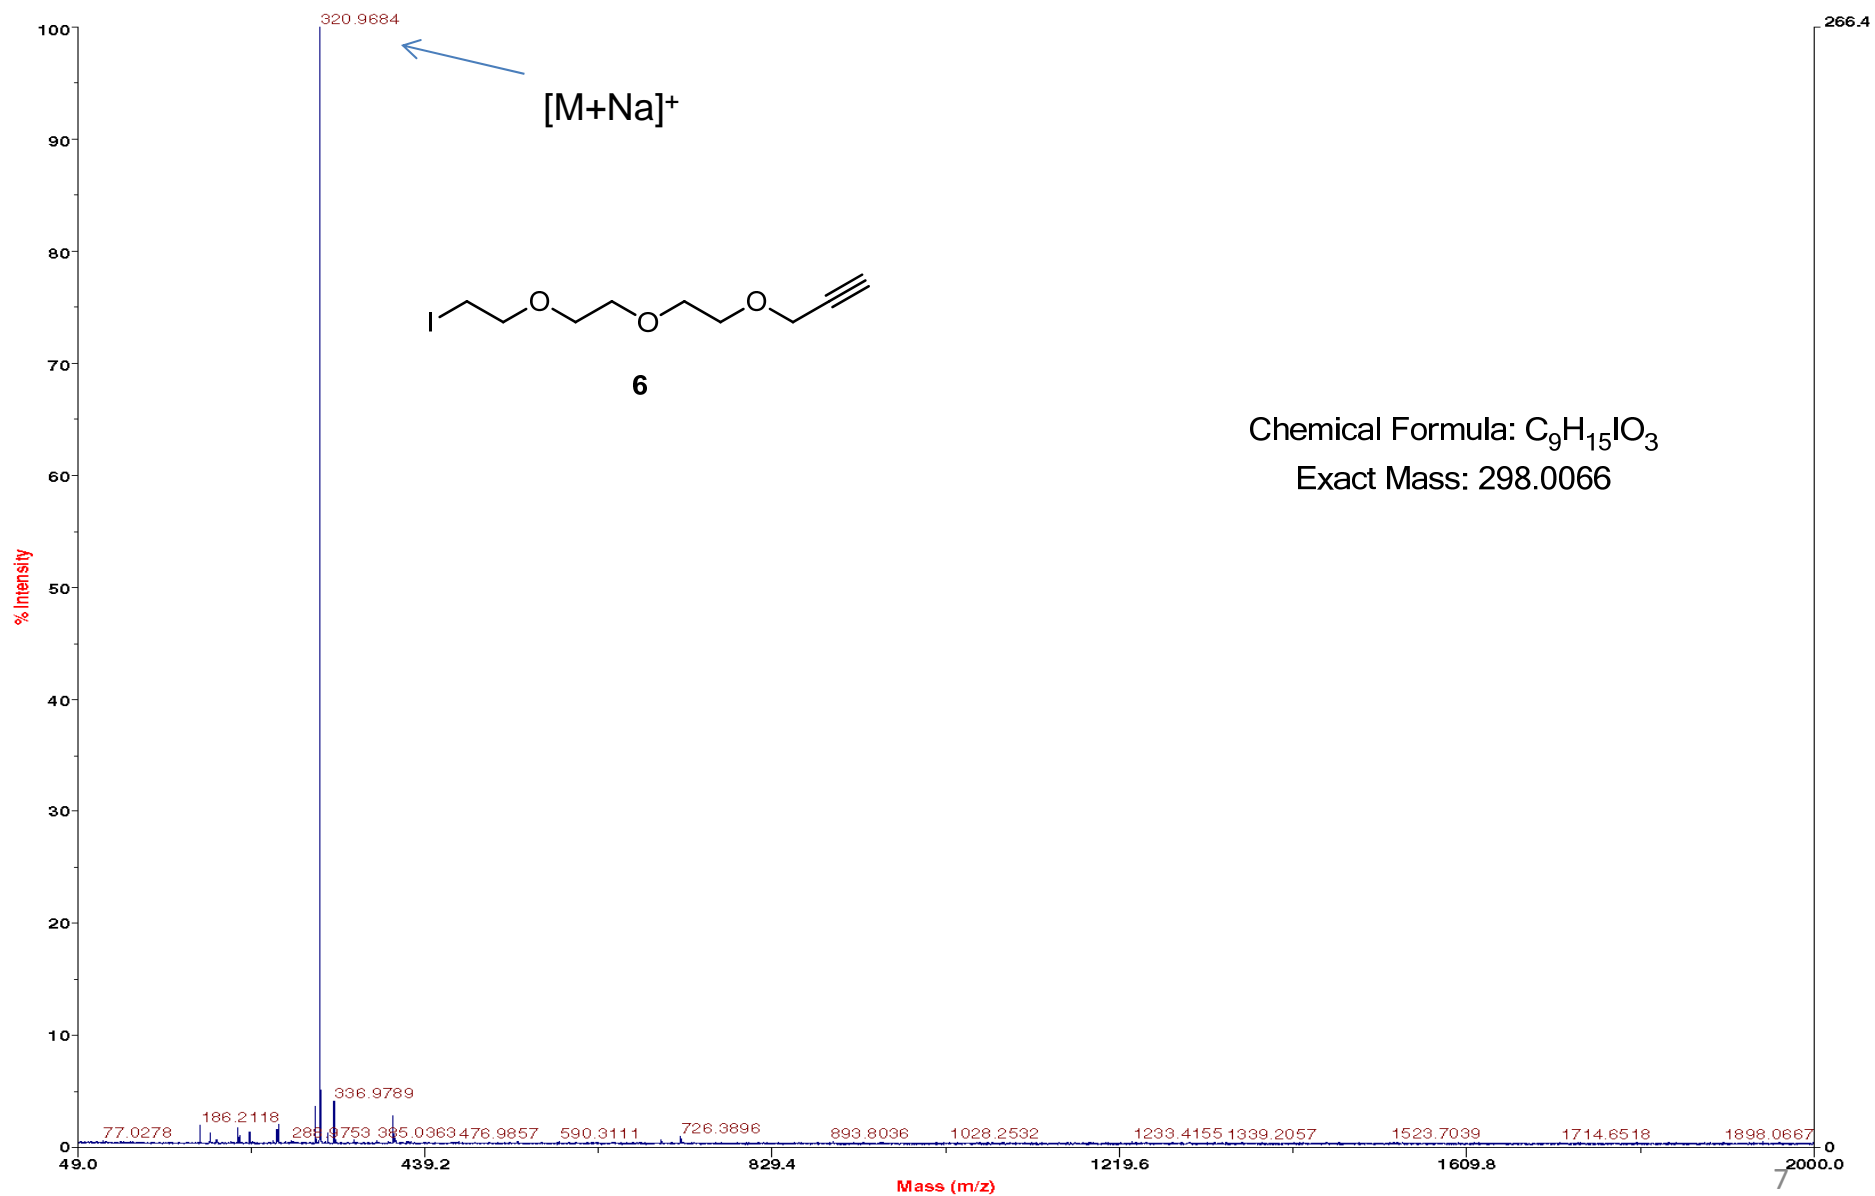





172.758  
172.419

82.112  
82.076  
79.457  
77.771  
77.452  
77.132  
74.639  
70.105  
69.724  
69.580  
68.878  
67.022  
58.262  
56.315  
55.550  
52.066  
50.461  
49.661  
28.123  
27.953  
27.842

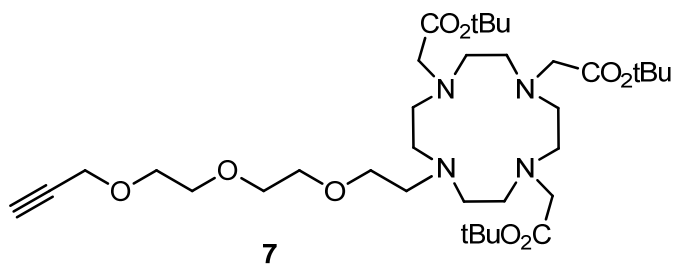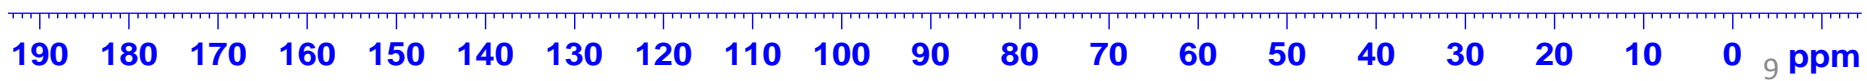

# Applied Biosystems Mariner System 5268

Mariner Spec /1:40 (T /0.00:0.69) ASC[BP = 707.6, 1400]

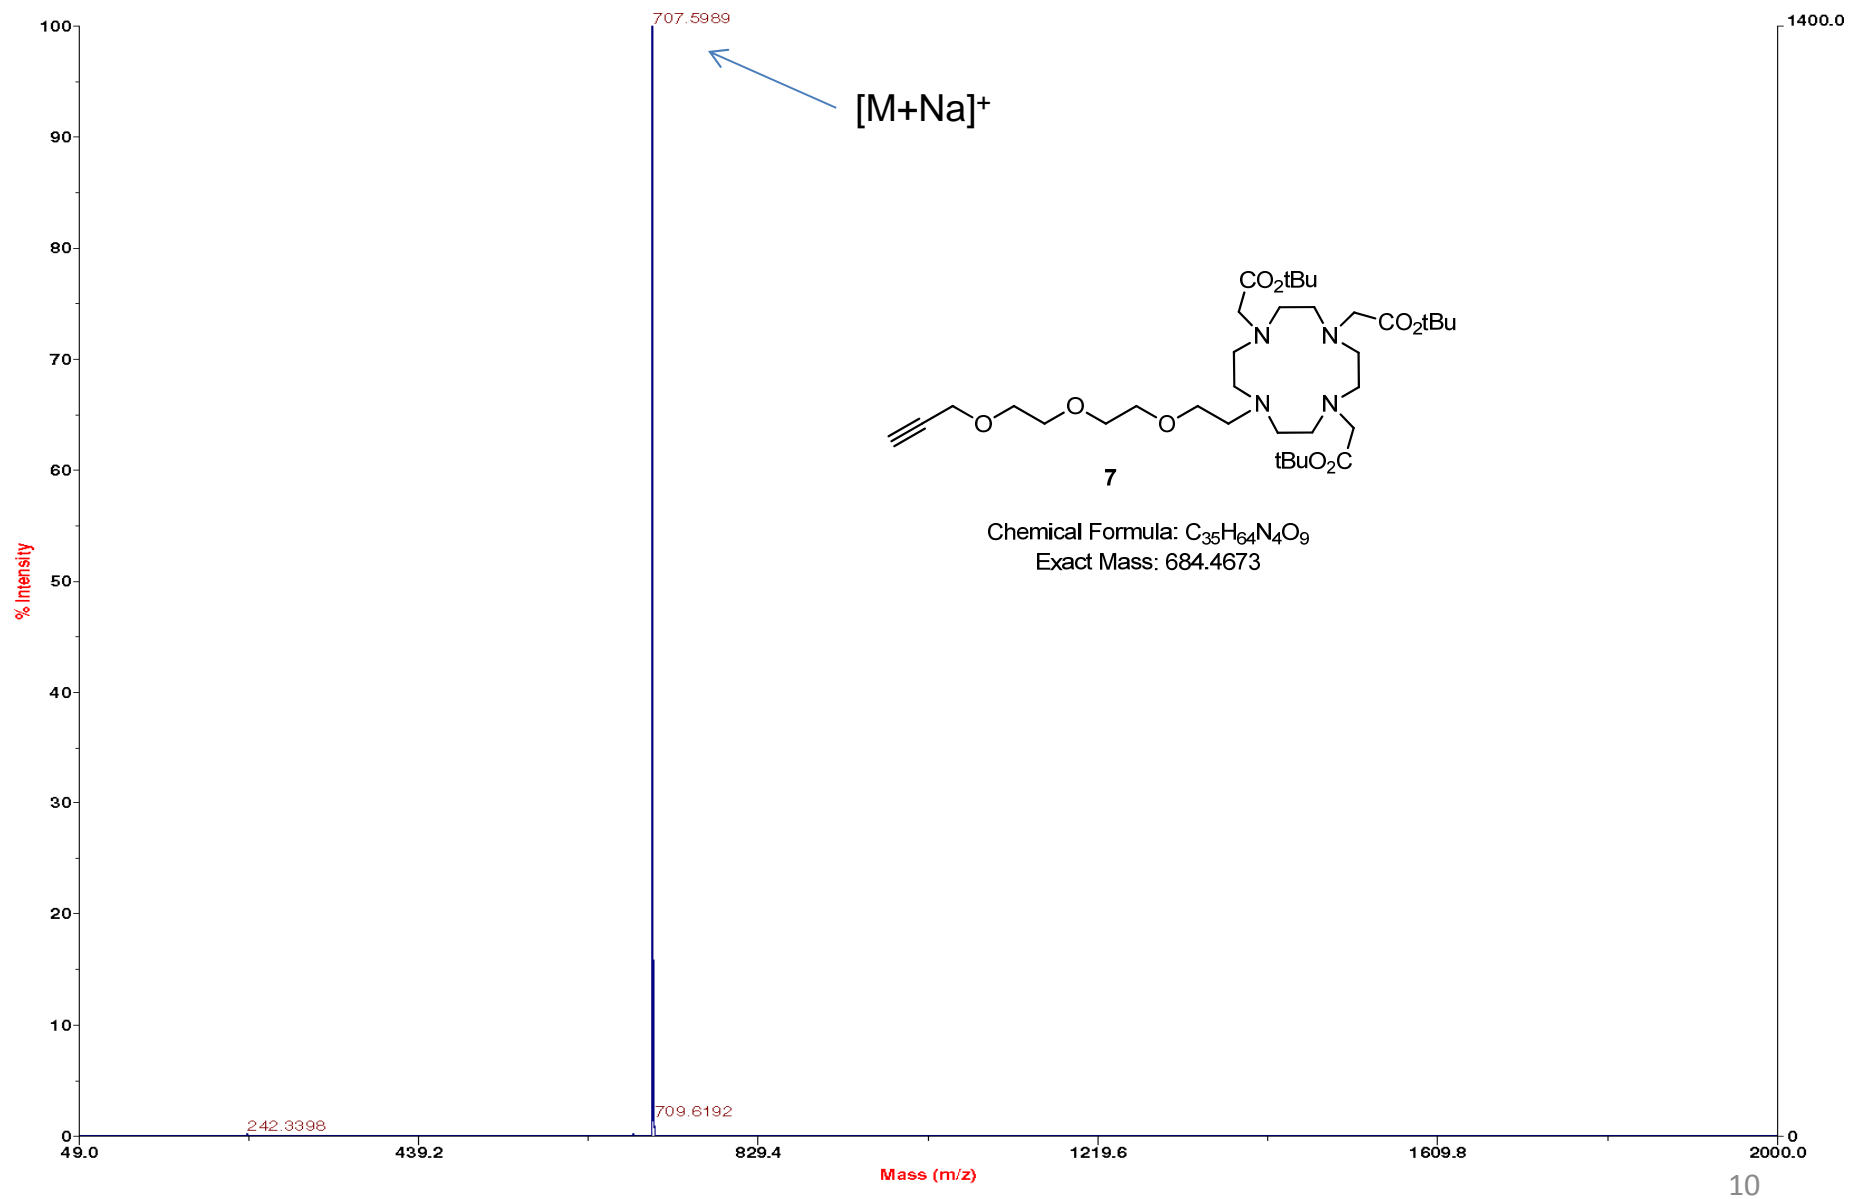

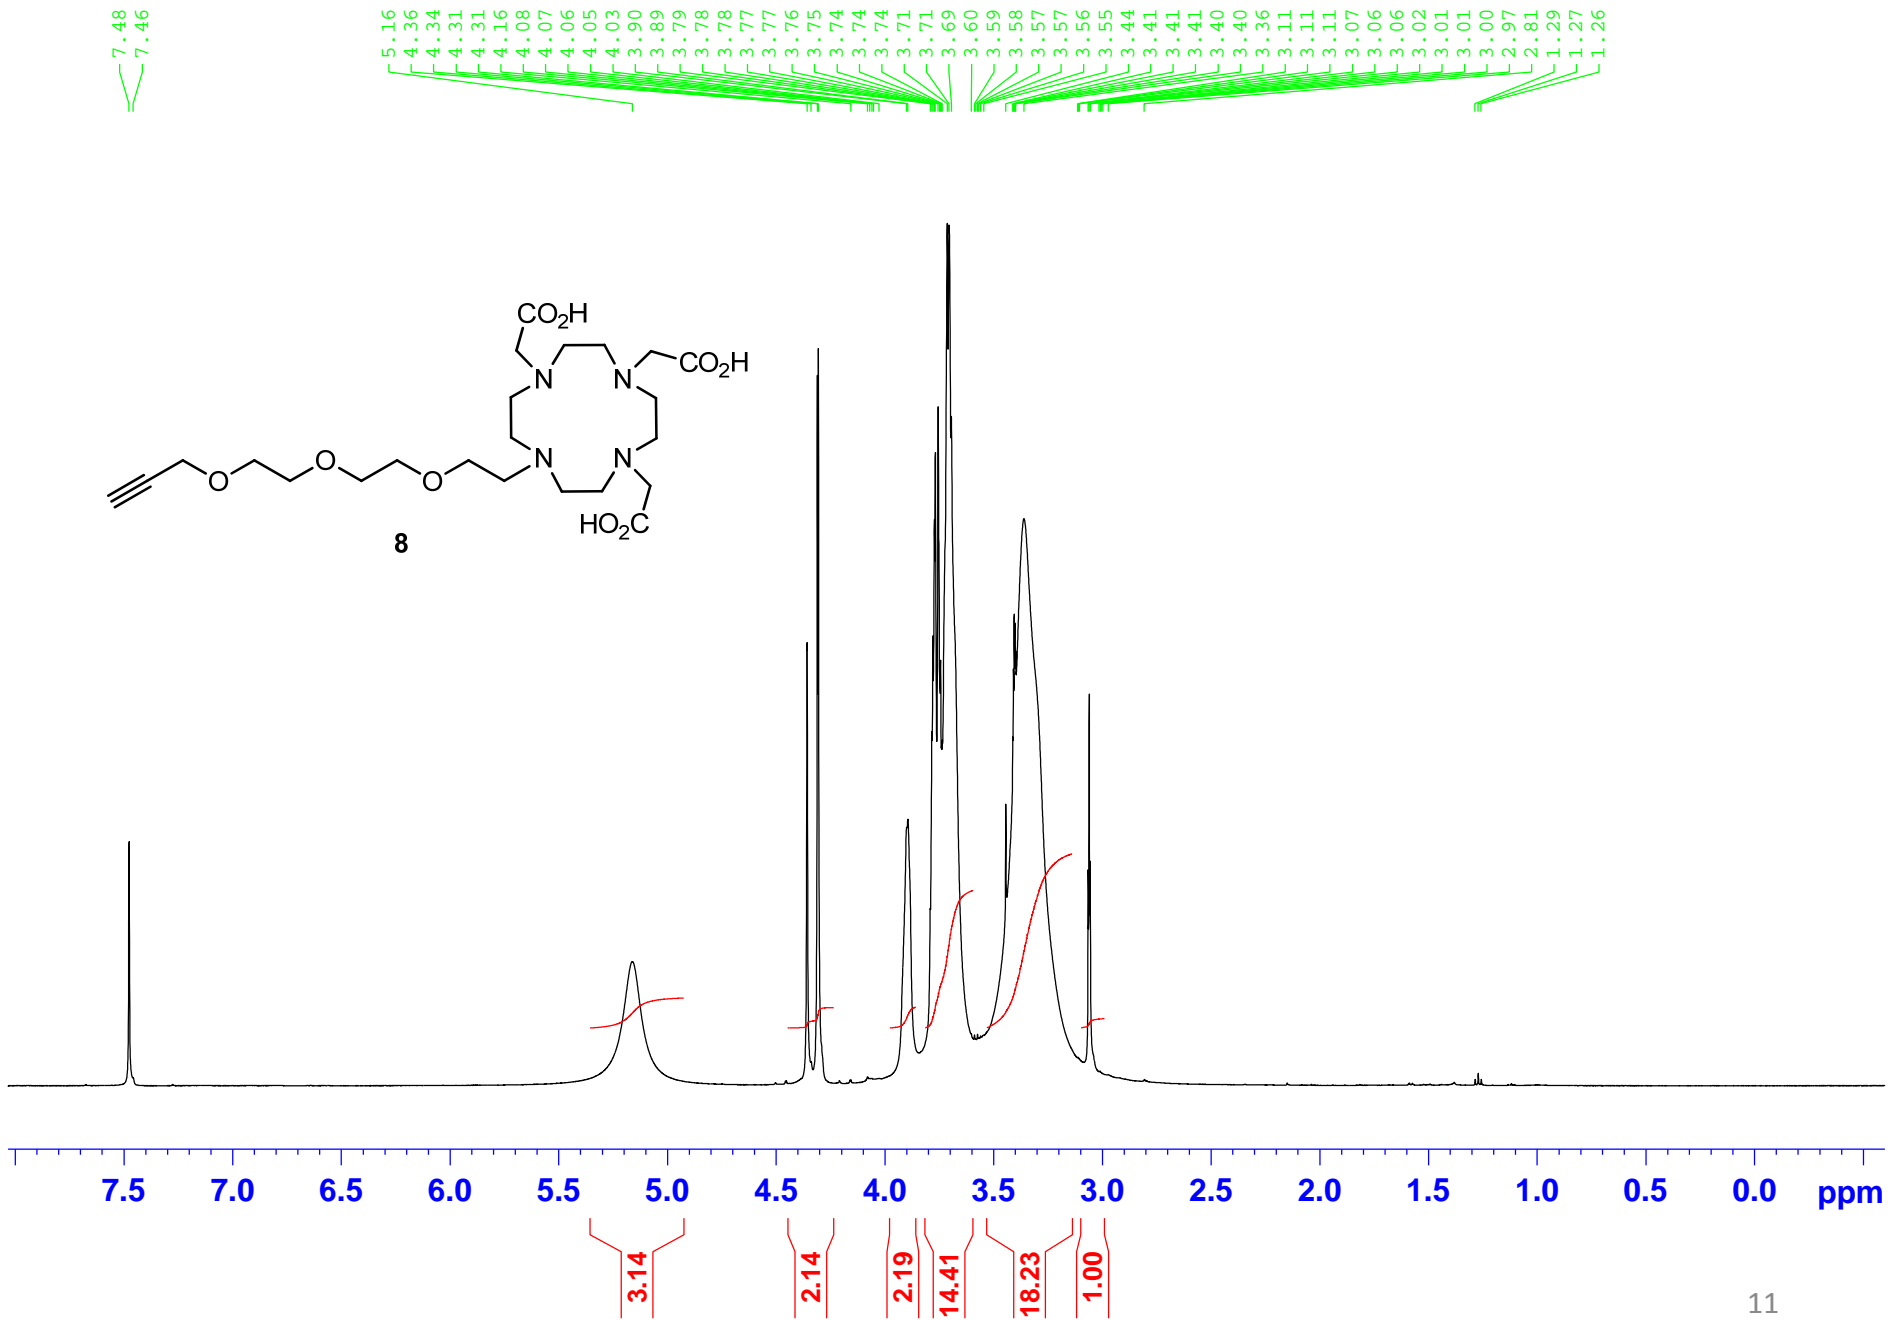

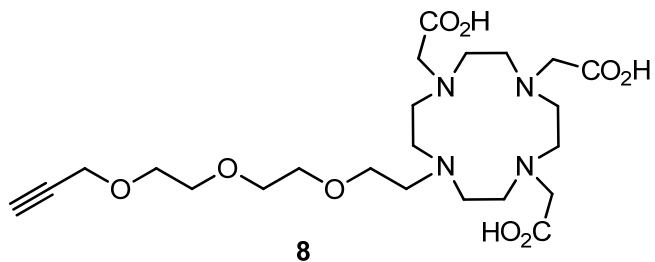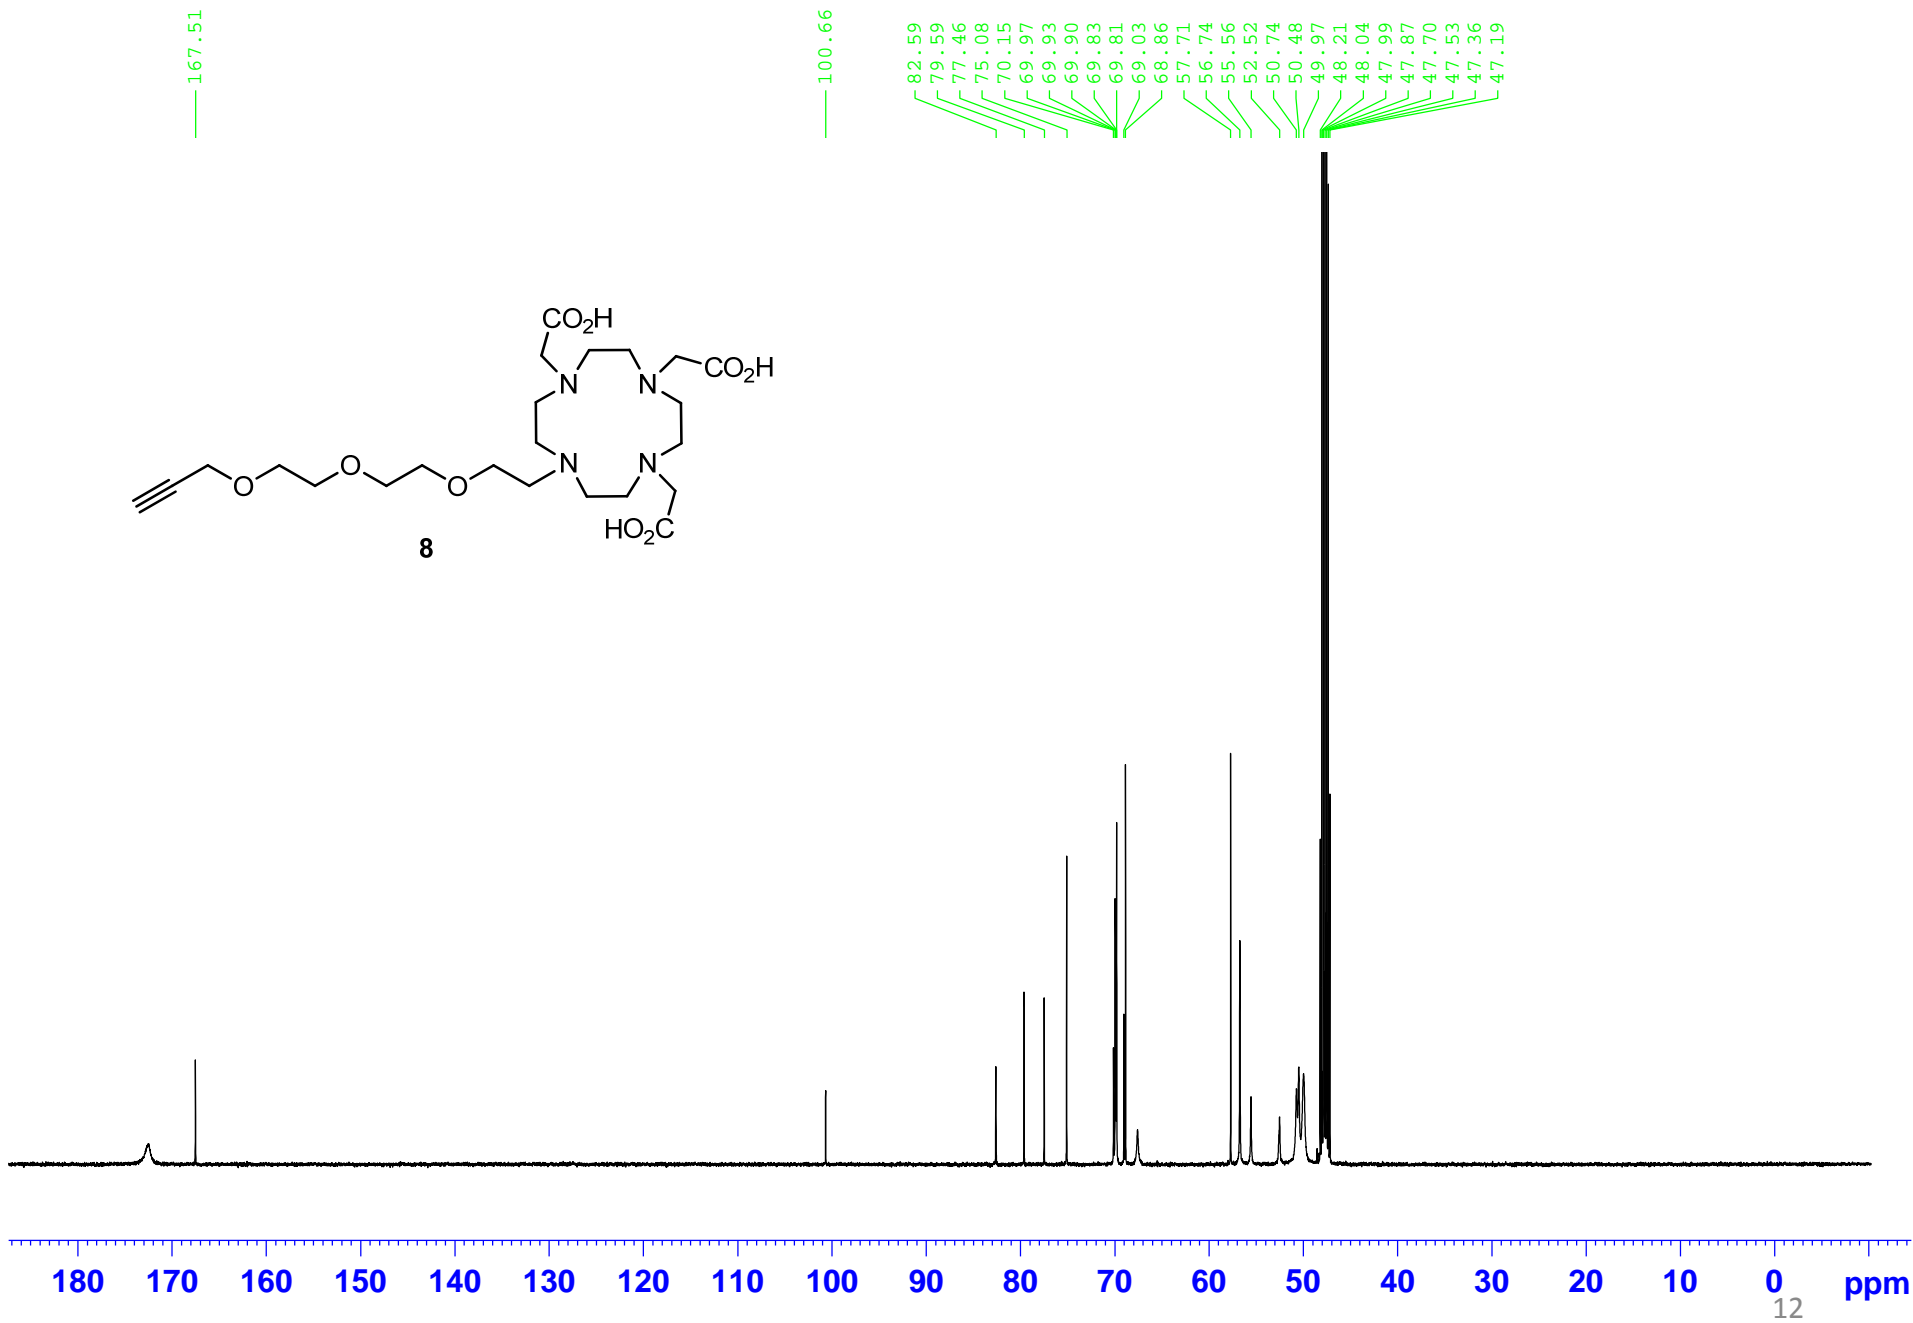

# Applied Biosystems Mariner System 5268

Mariner Spec /1:34 ASC[BP = 539.3, 108]

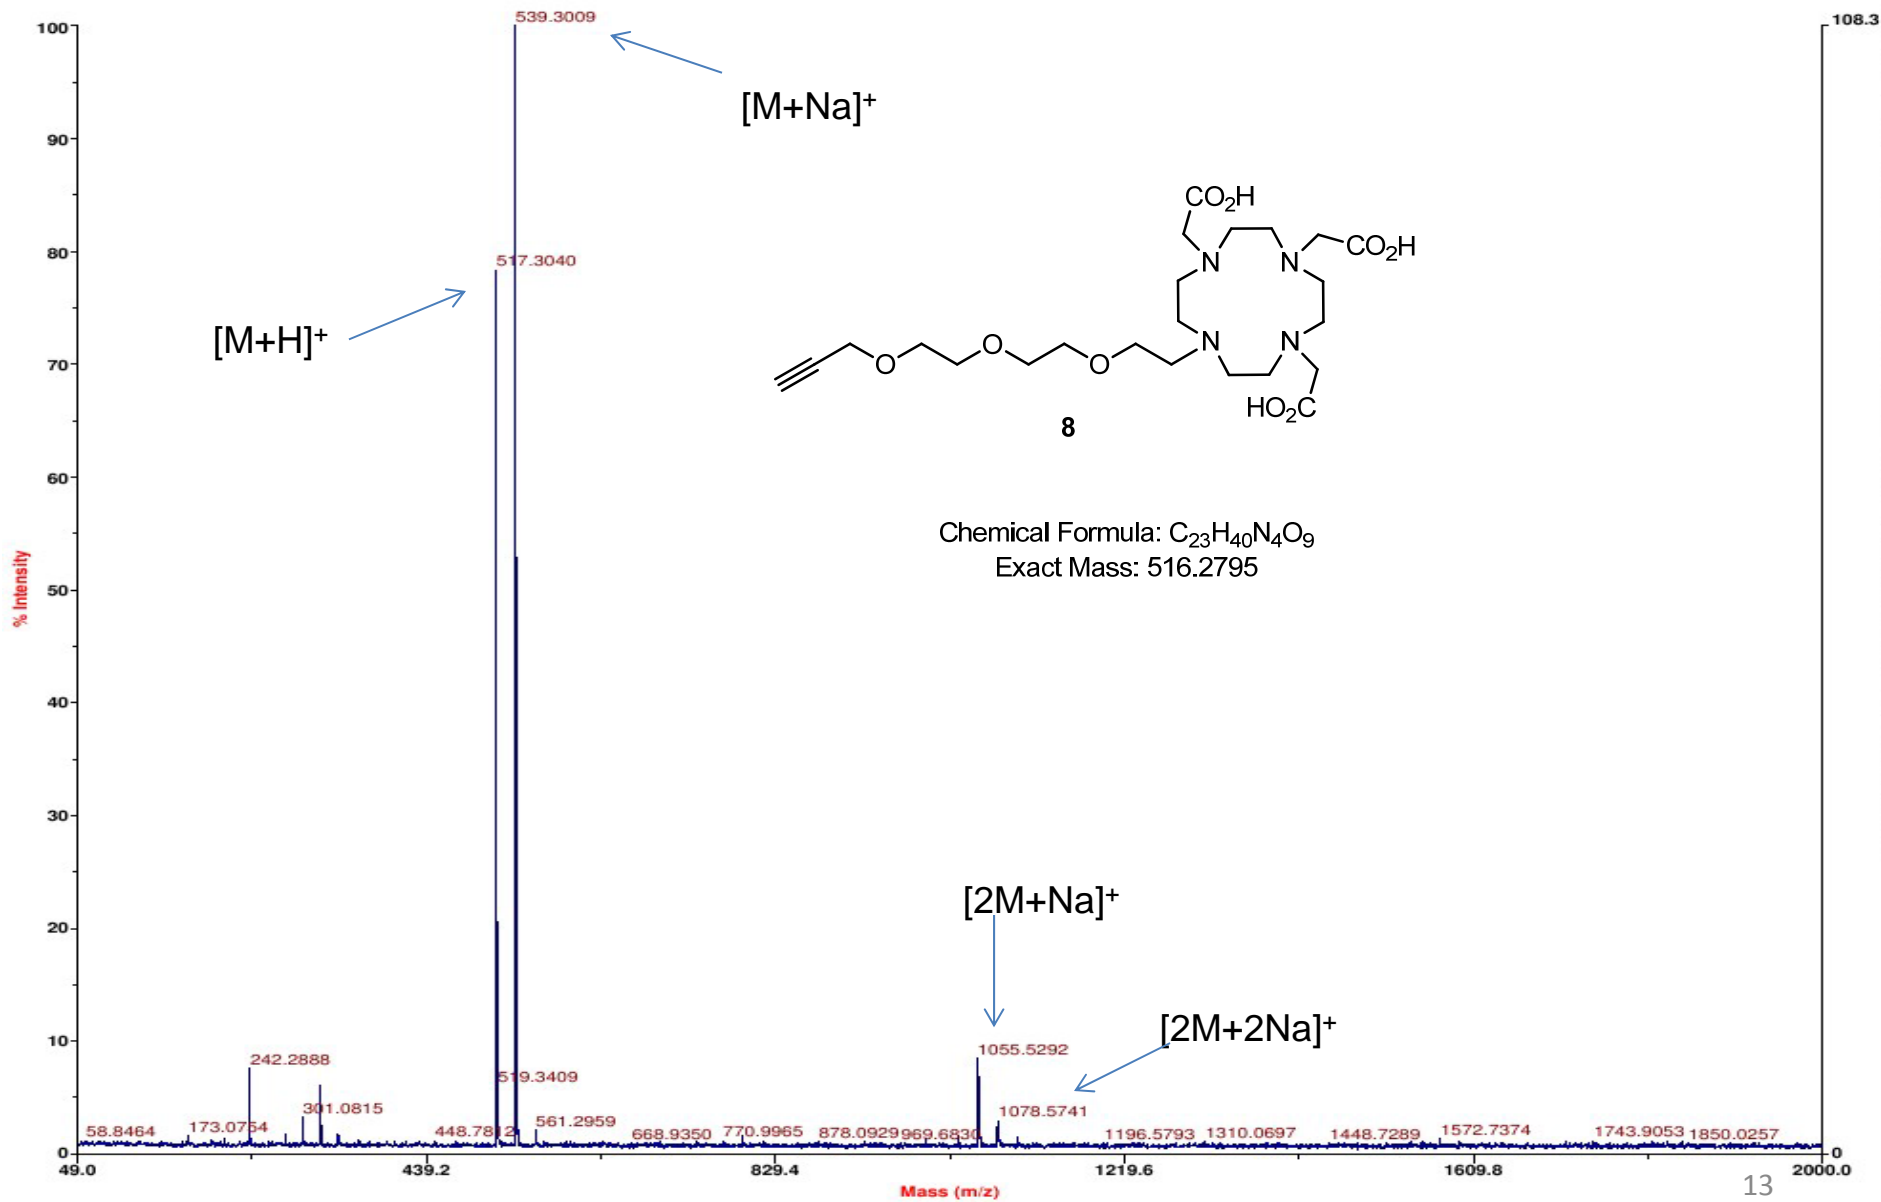

# Applied Biosystems Mariner System 5268

Mariner Spec #1:27 ASC[BP = 694.2, 82]

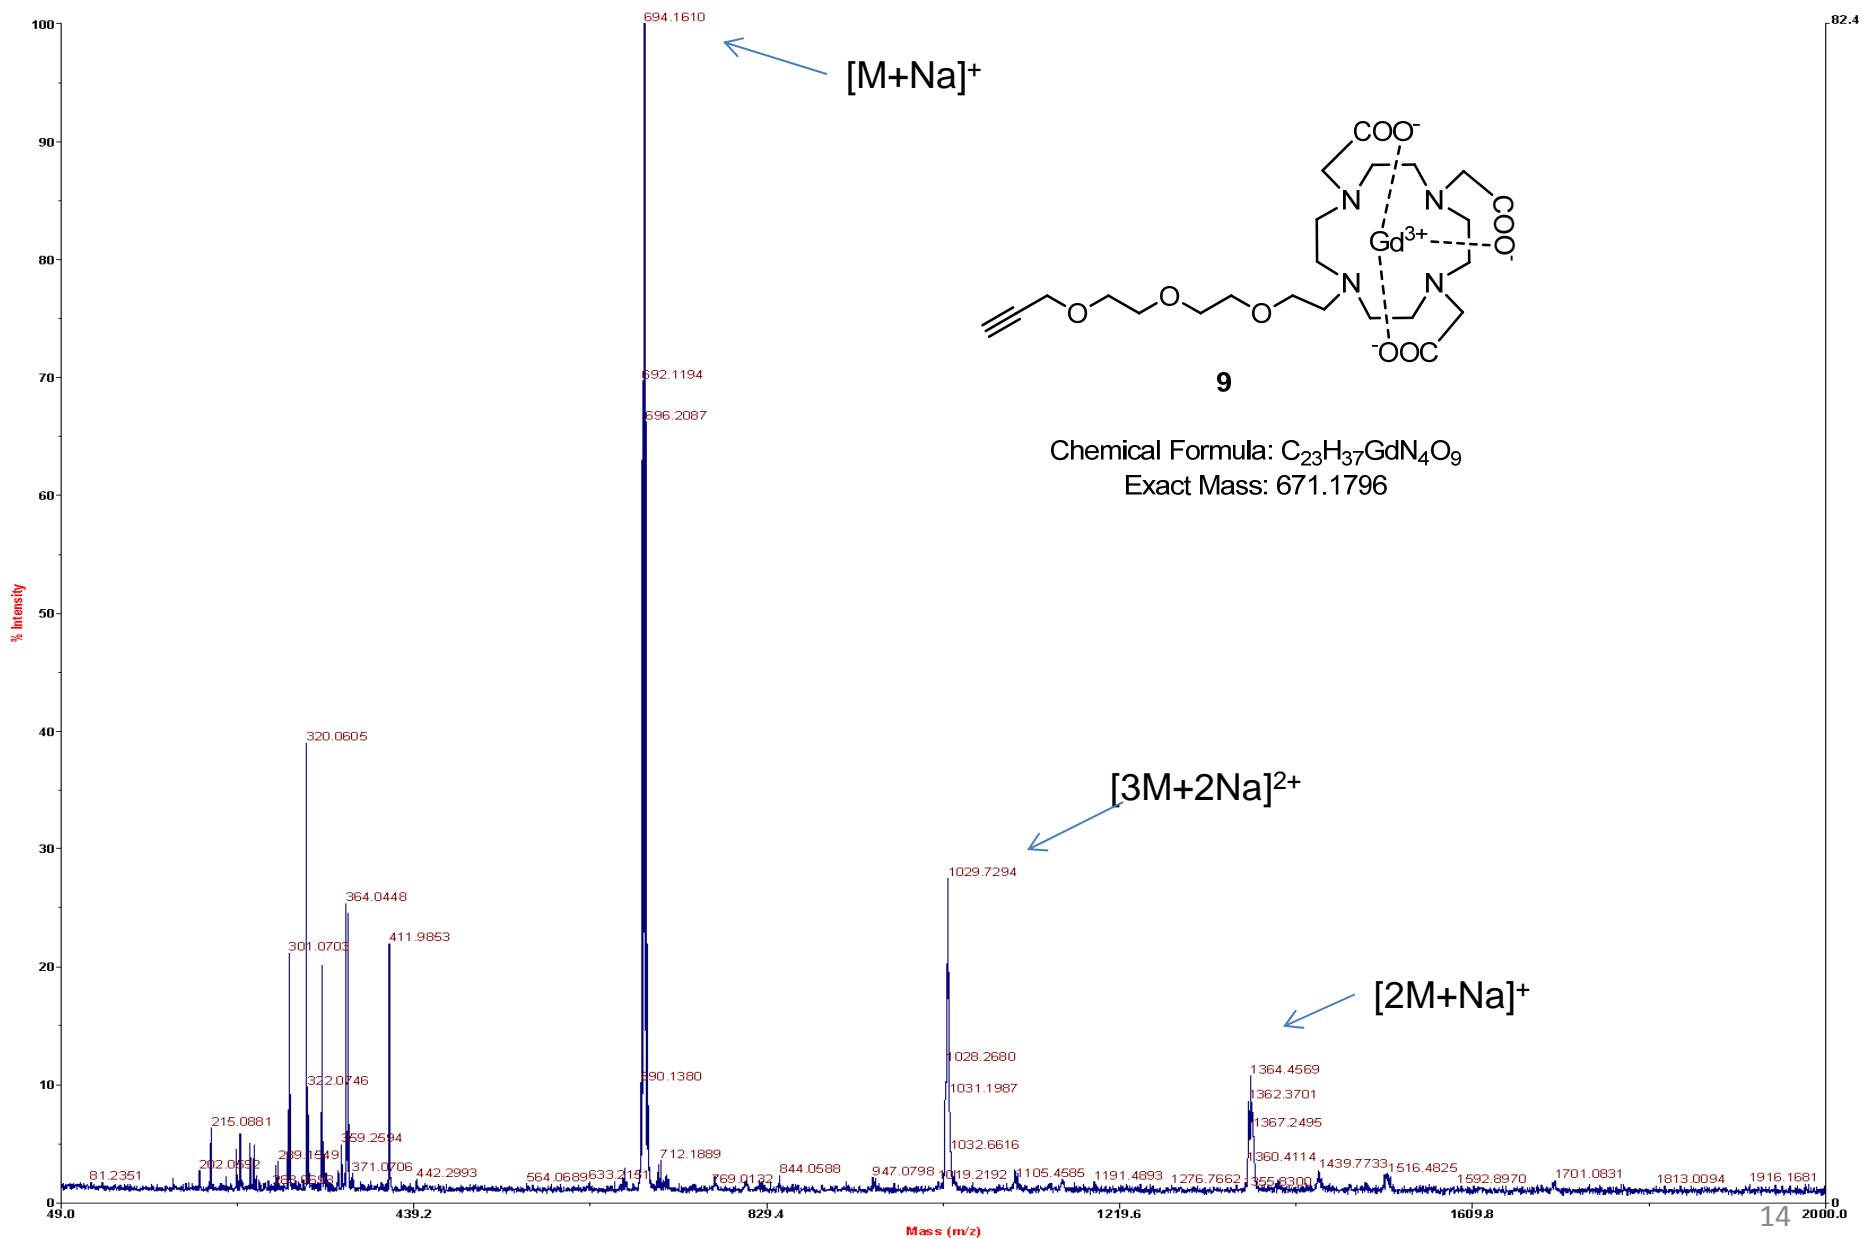

# Applied Biosystems Mariner System 5219

Mariner Spec /1:24 ASC[BP = 706.4, 35]

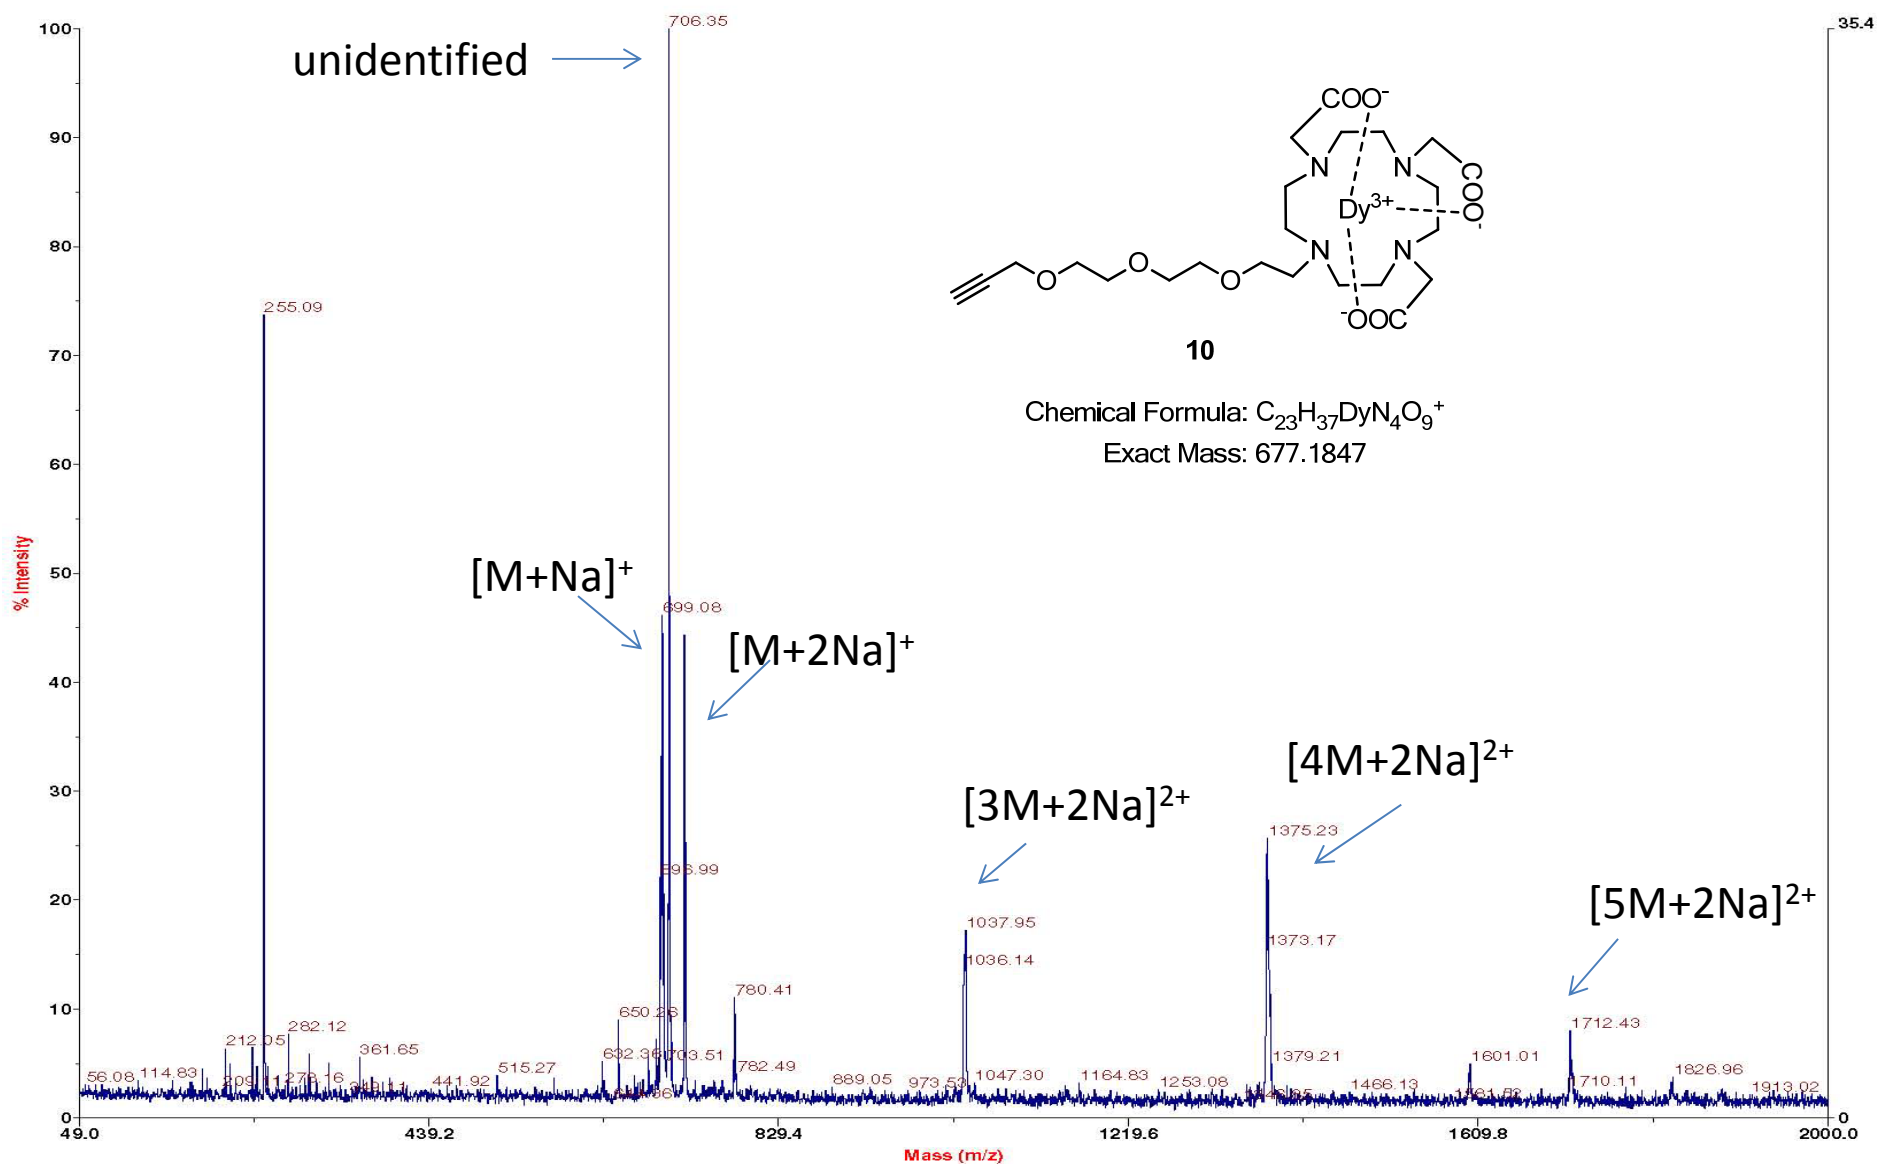

B12-bromoacetic ester  
B11 CDC13 {C:\Bruker\TOPSPIN} goswami 10

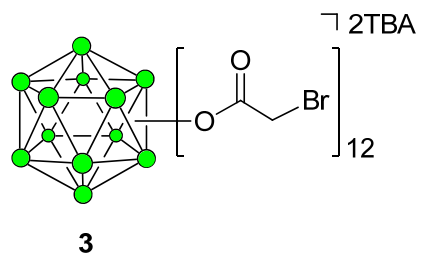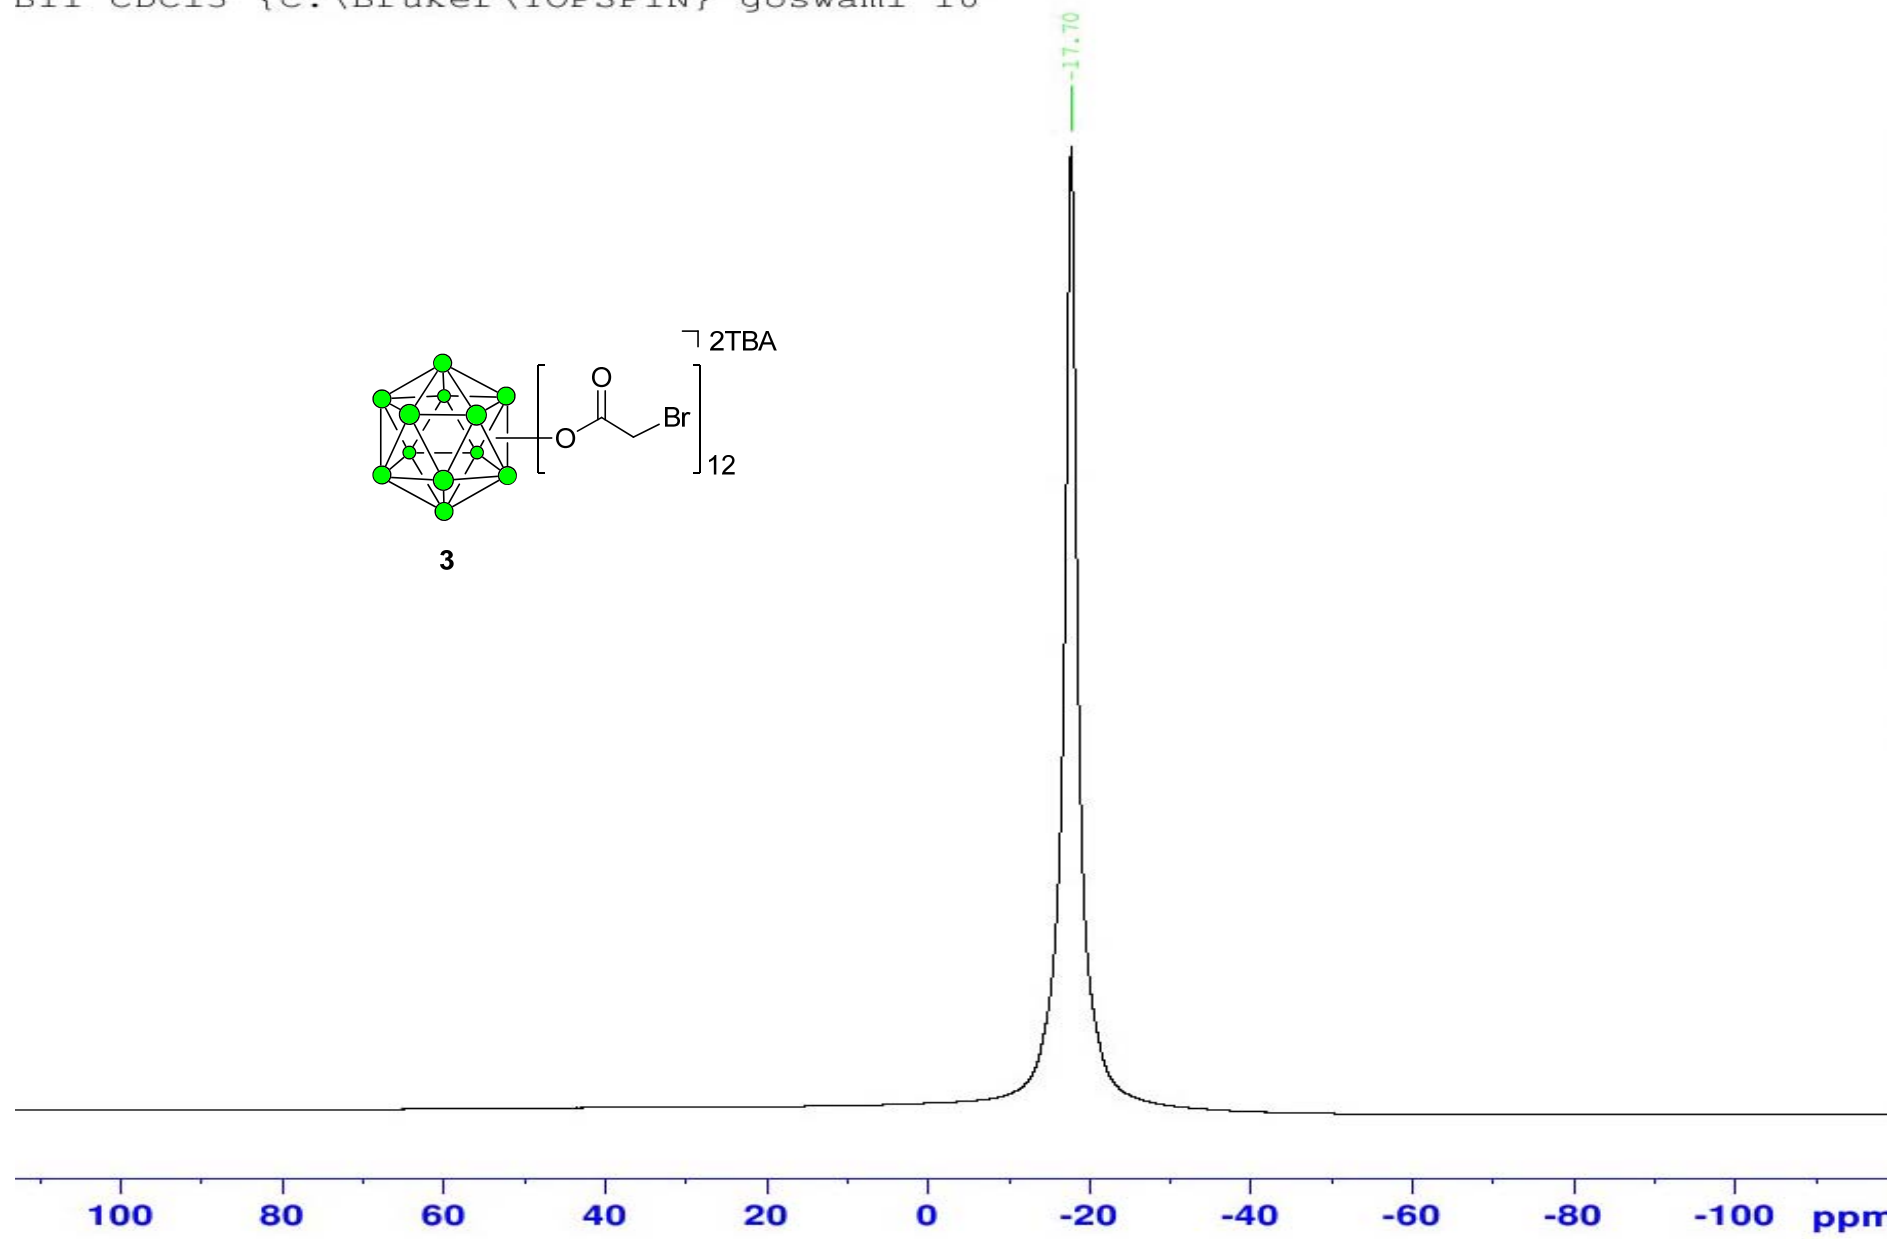



B12-bromoacetic ester  
proton CDCl3 {C:\Bruker\TOPSPIN} goswami 9

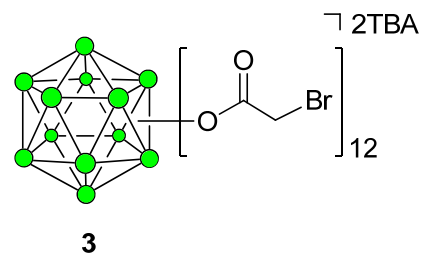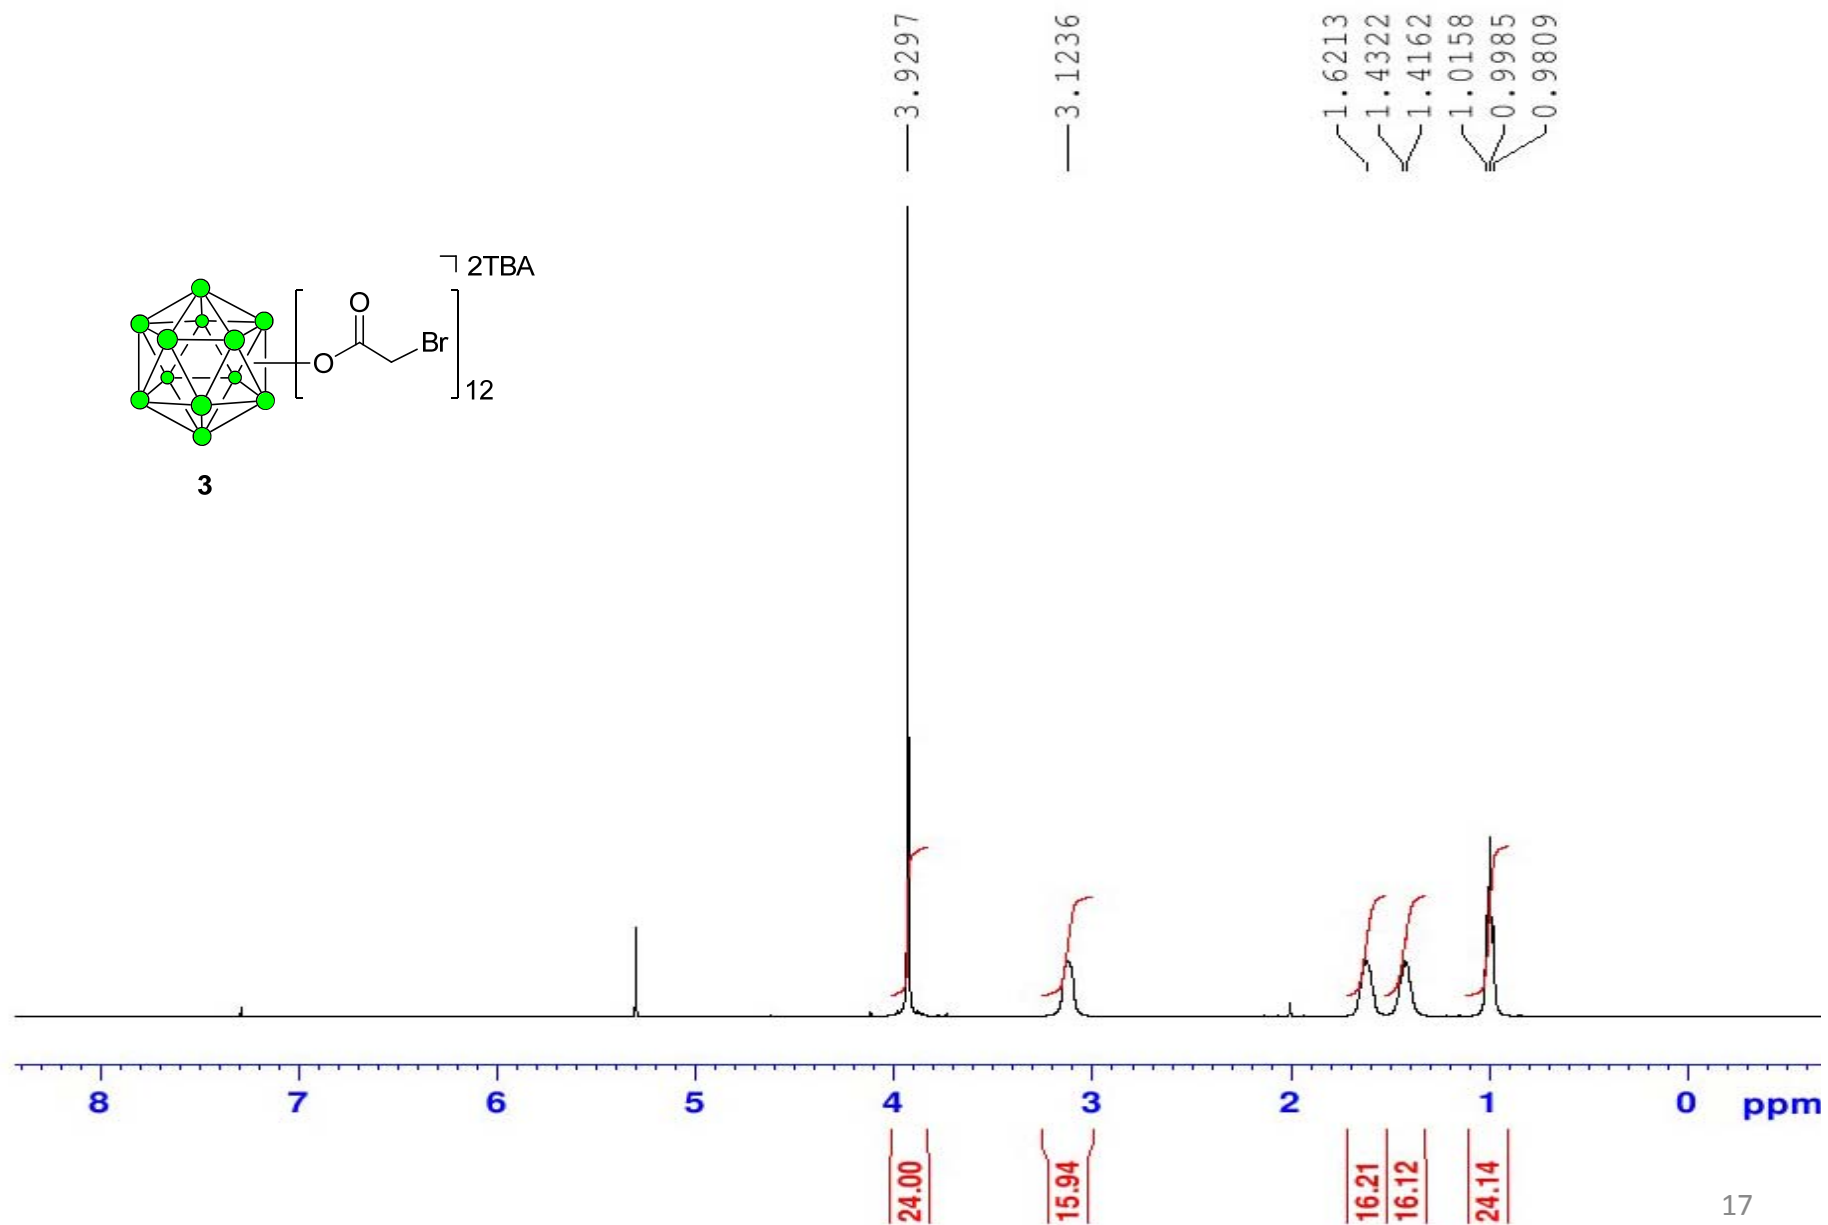

B12-bromoacetic ester  
C13 CDC13 {C:\Bruker\TOPSPIN} goswami 10

— 165.368

78.335  
78.017  
77.699

— 59.758  
— 54.504

— 31.348  
— 24.744  
— 20.501  
— 14.463

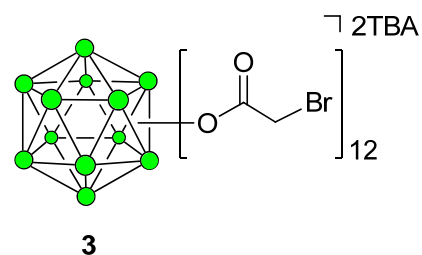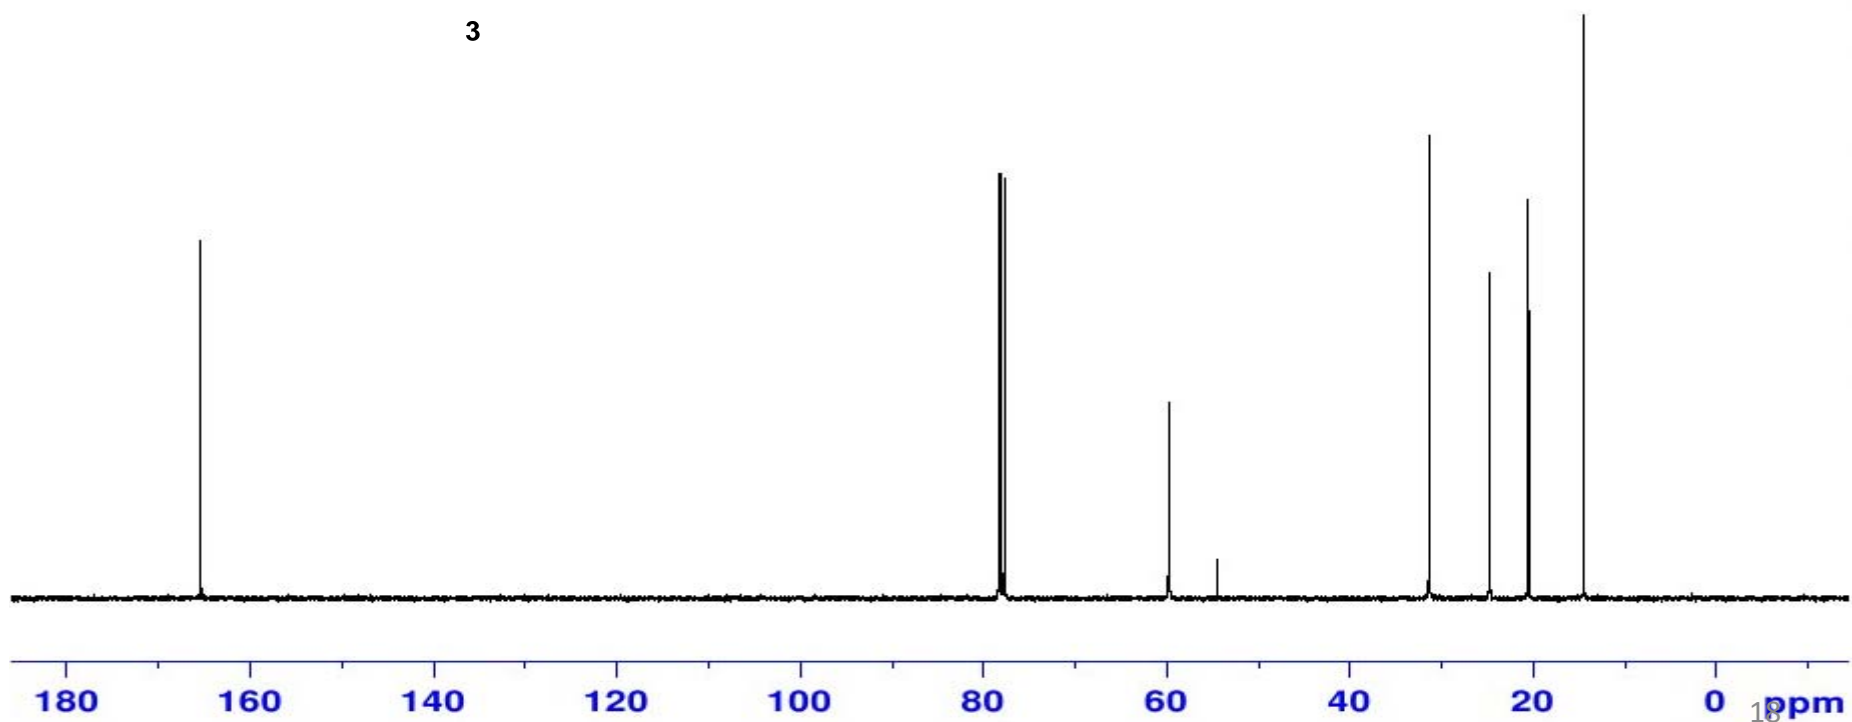



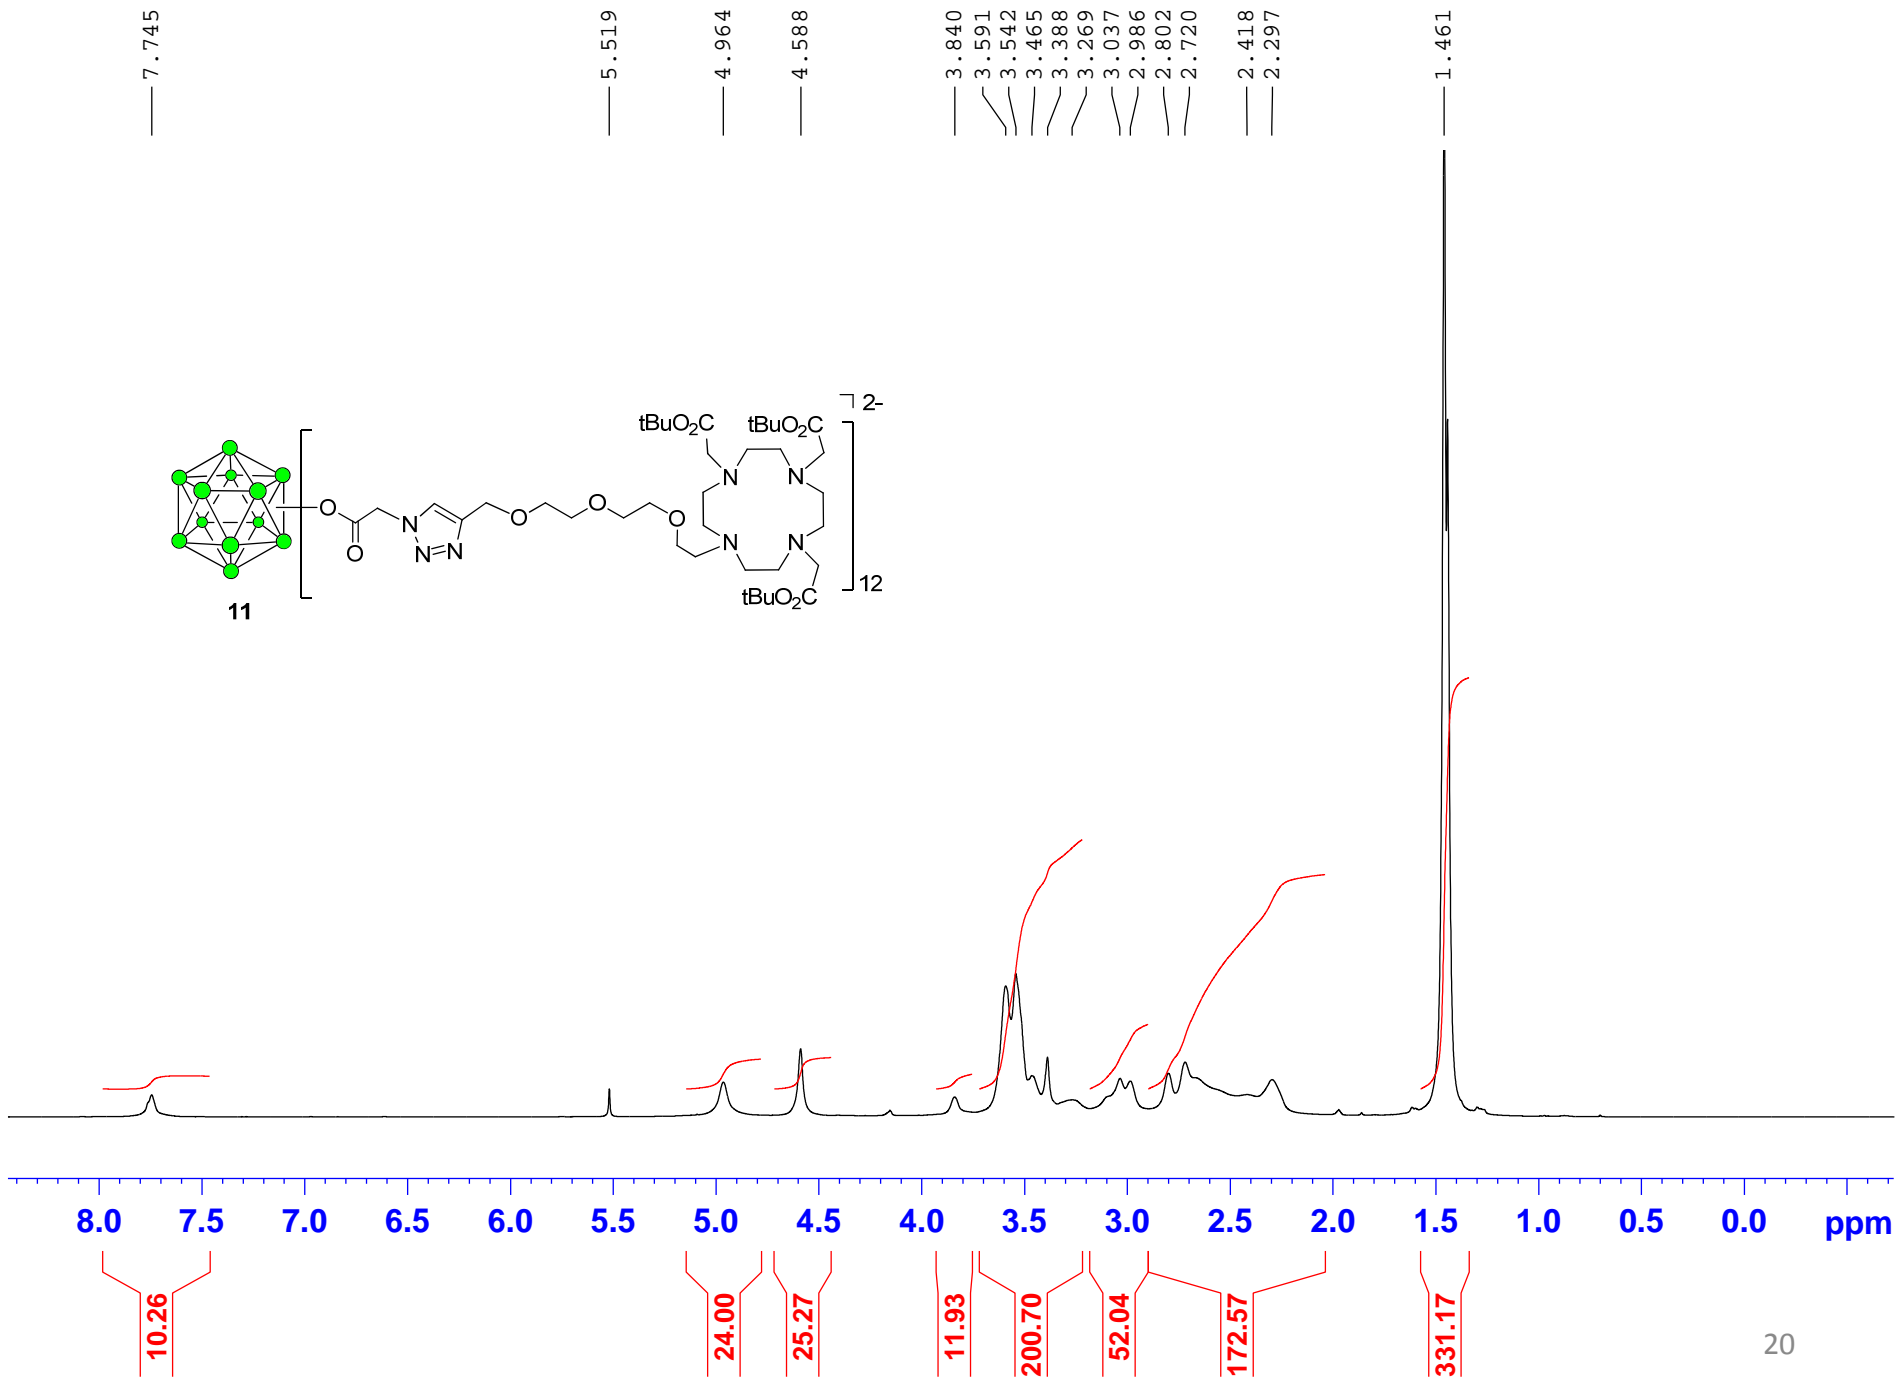

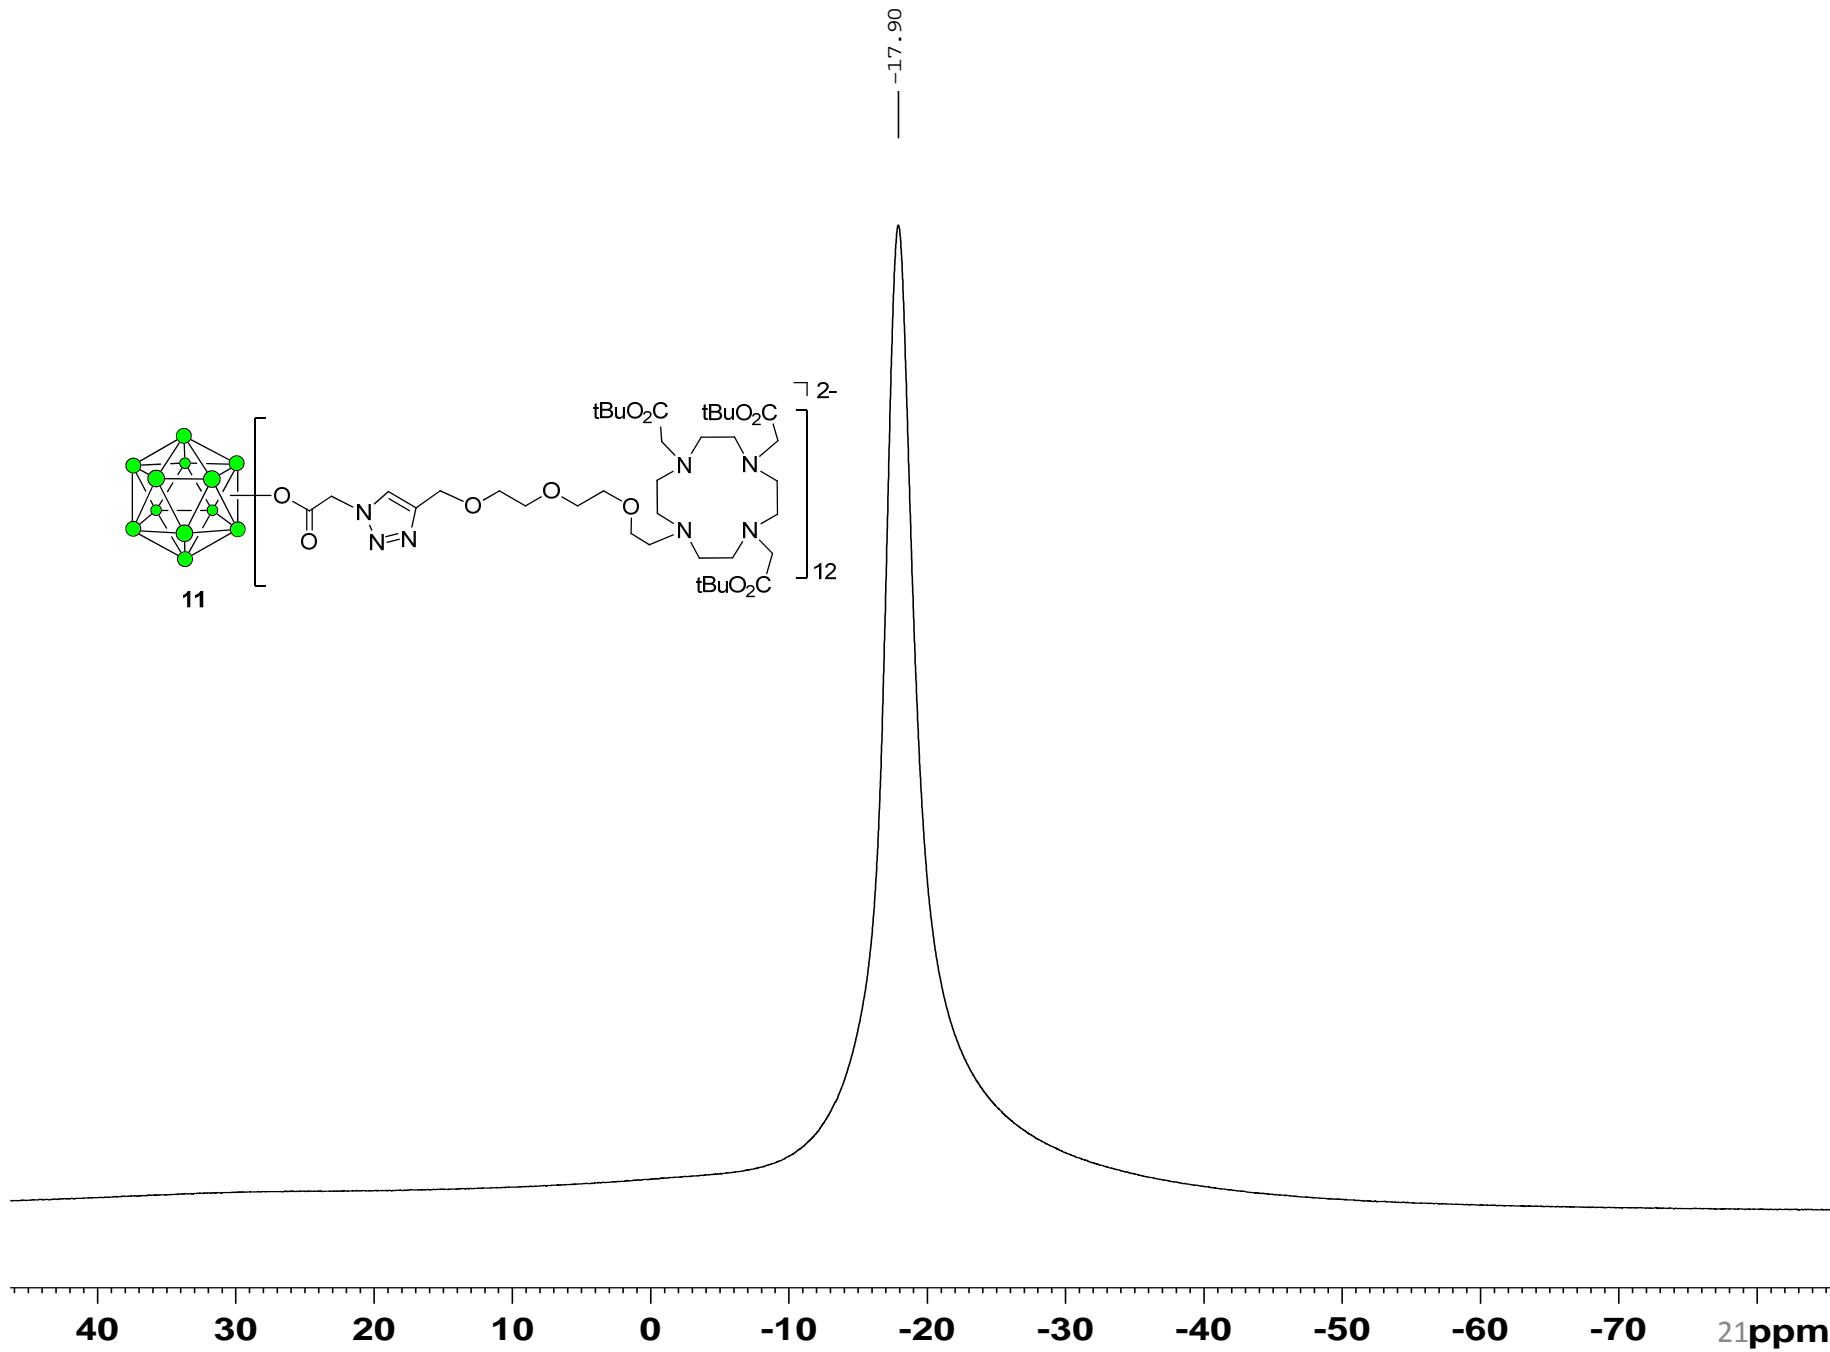



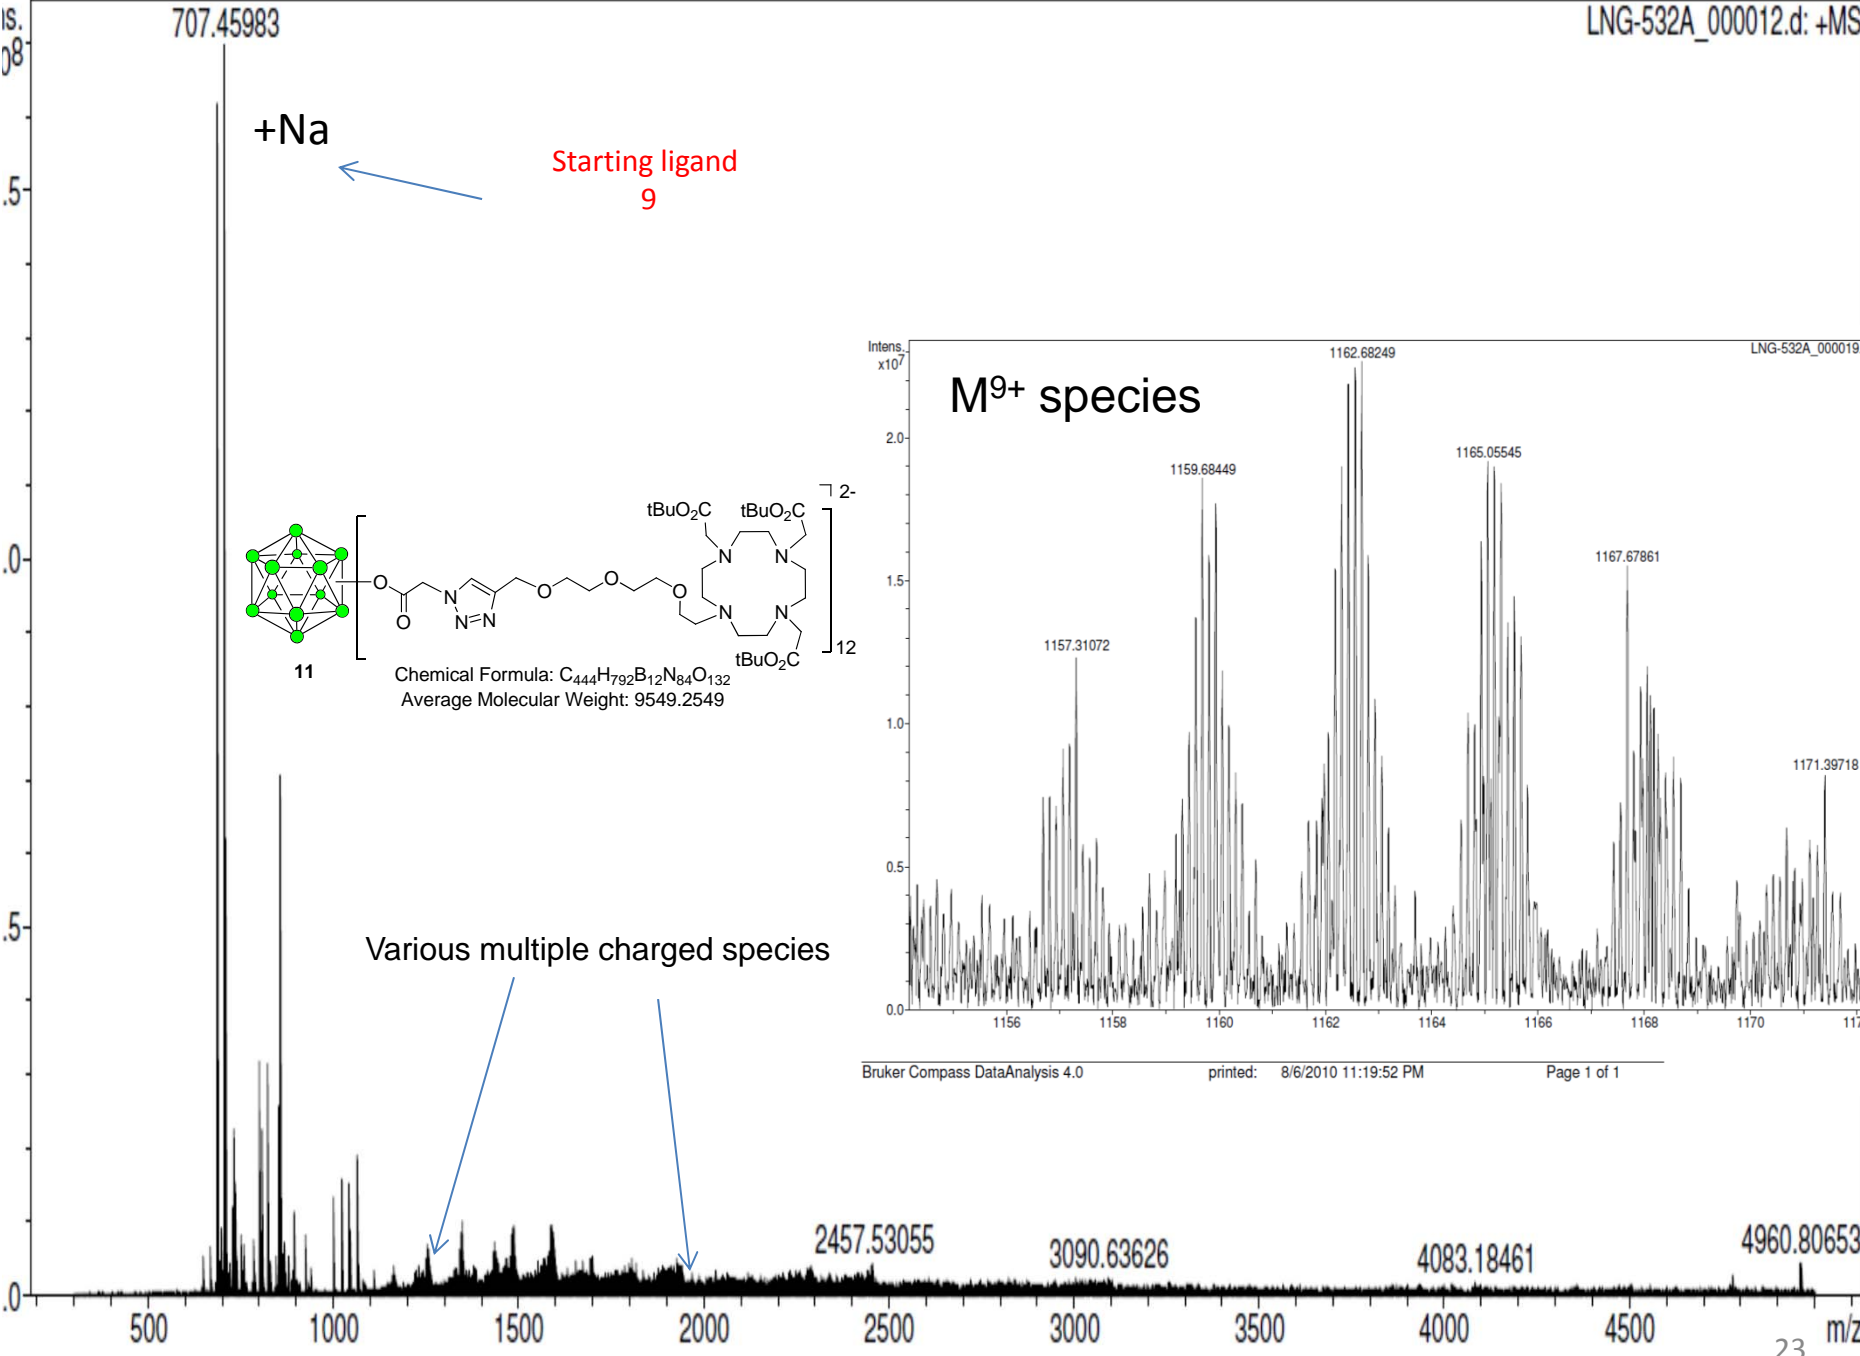

707.45983

+Na

Starting ligand  
9

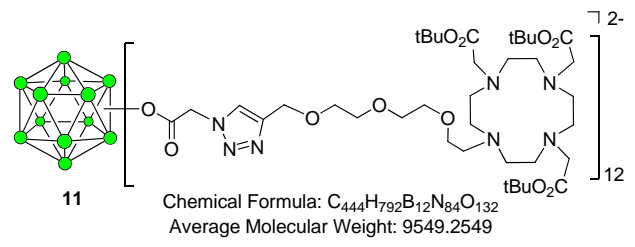

M<sup>9+</sup> species

Various multiple charged species

2457.53055

3090.63626

4083.18461

4960.80653

23

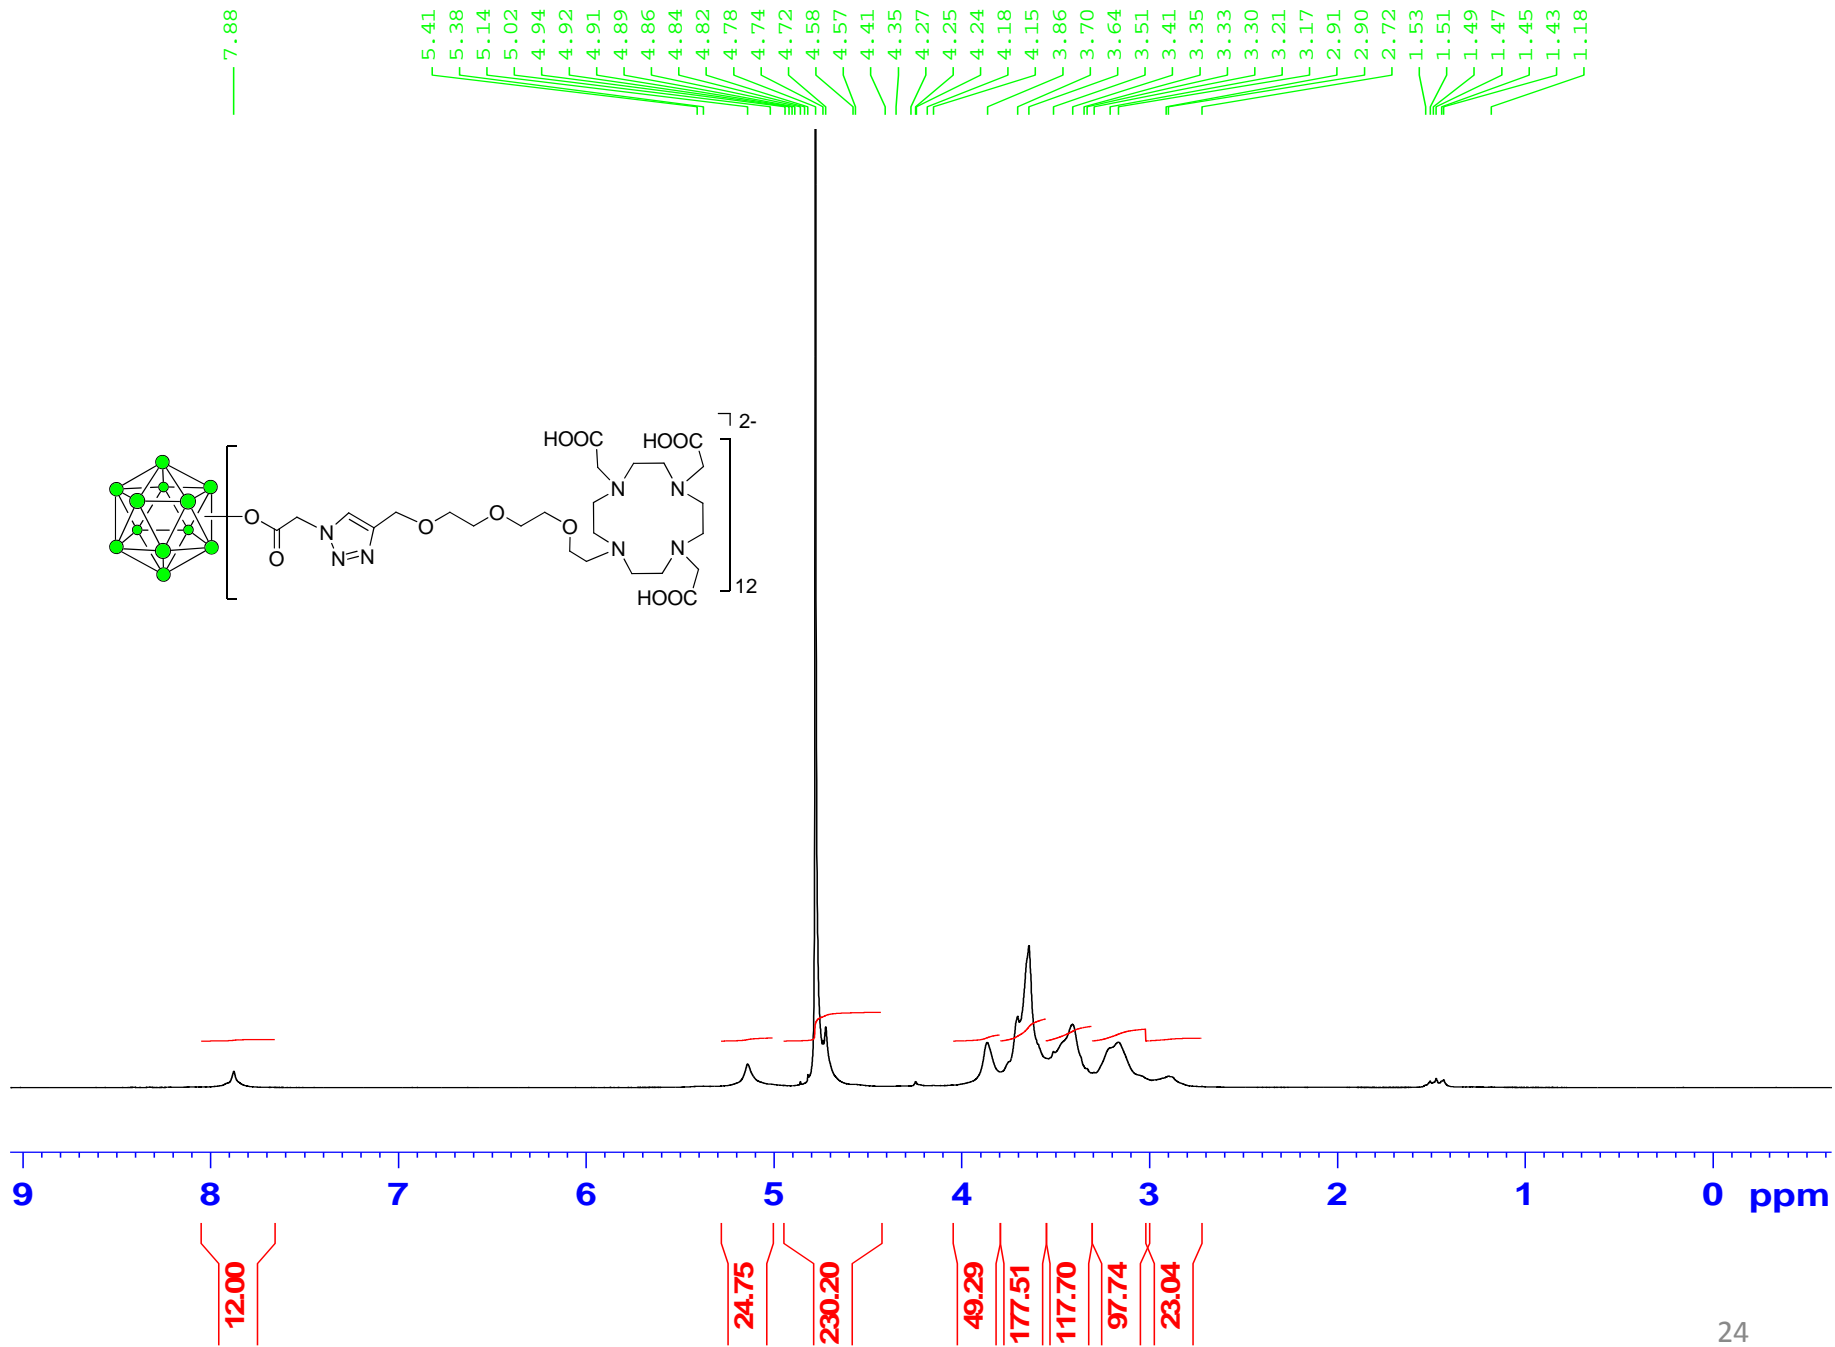



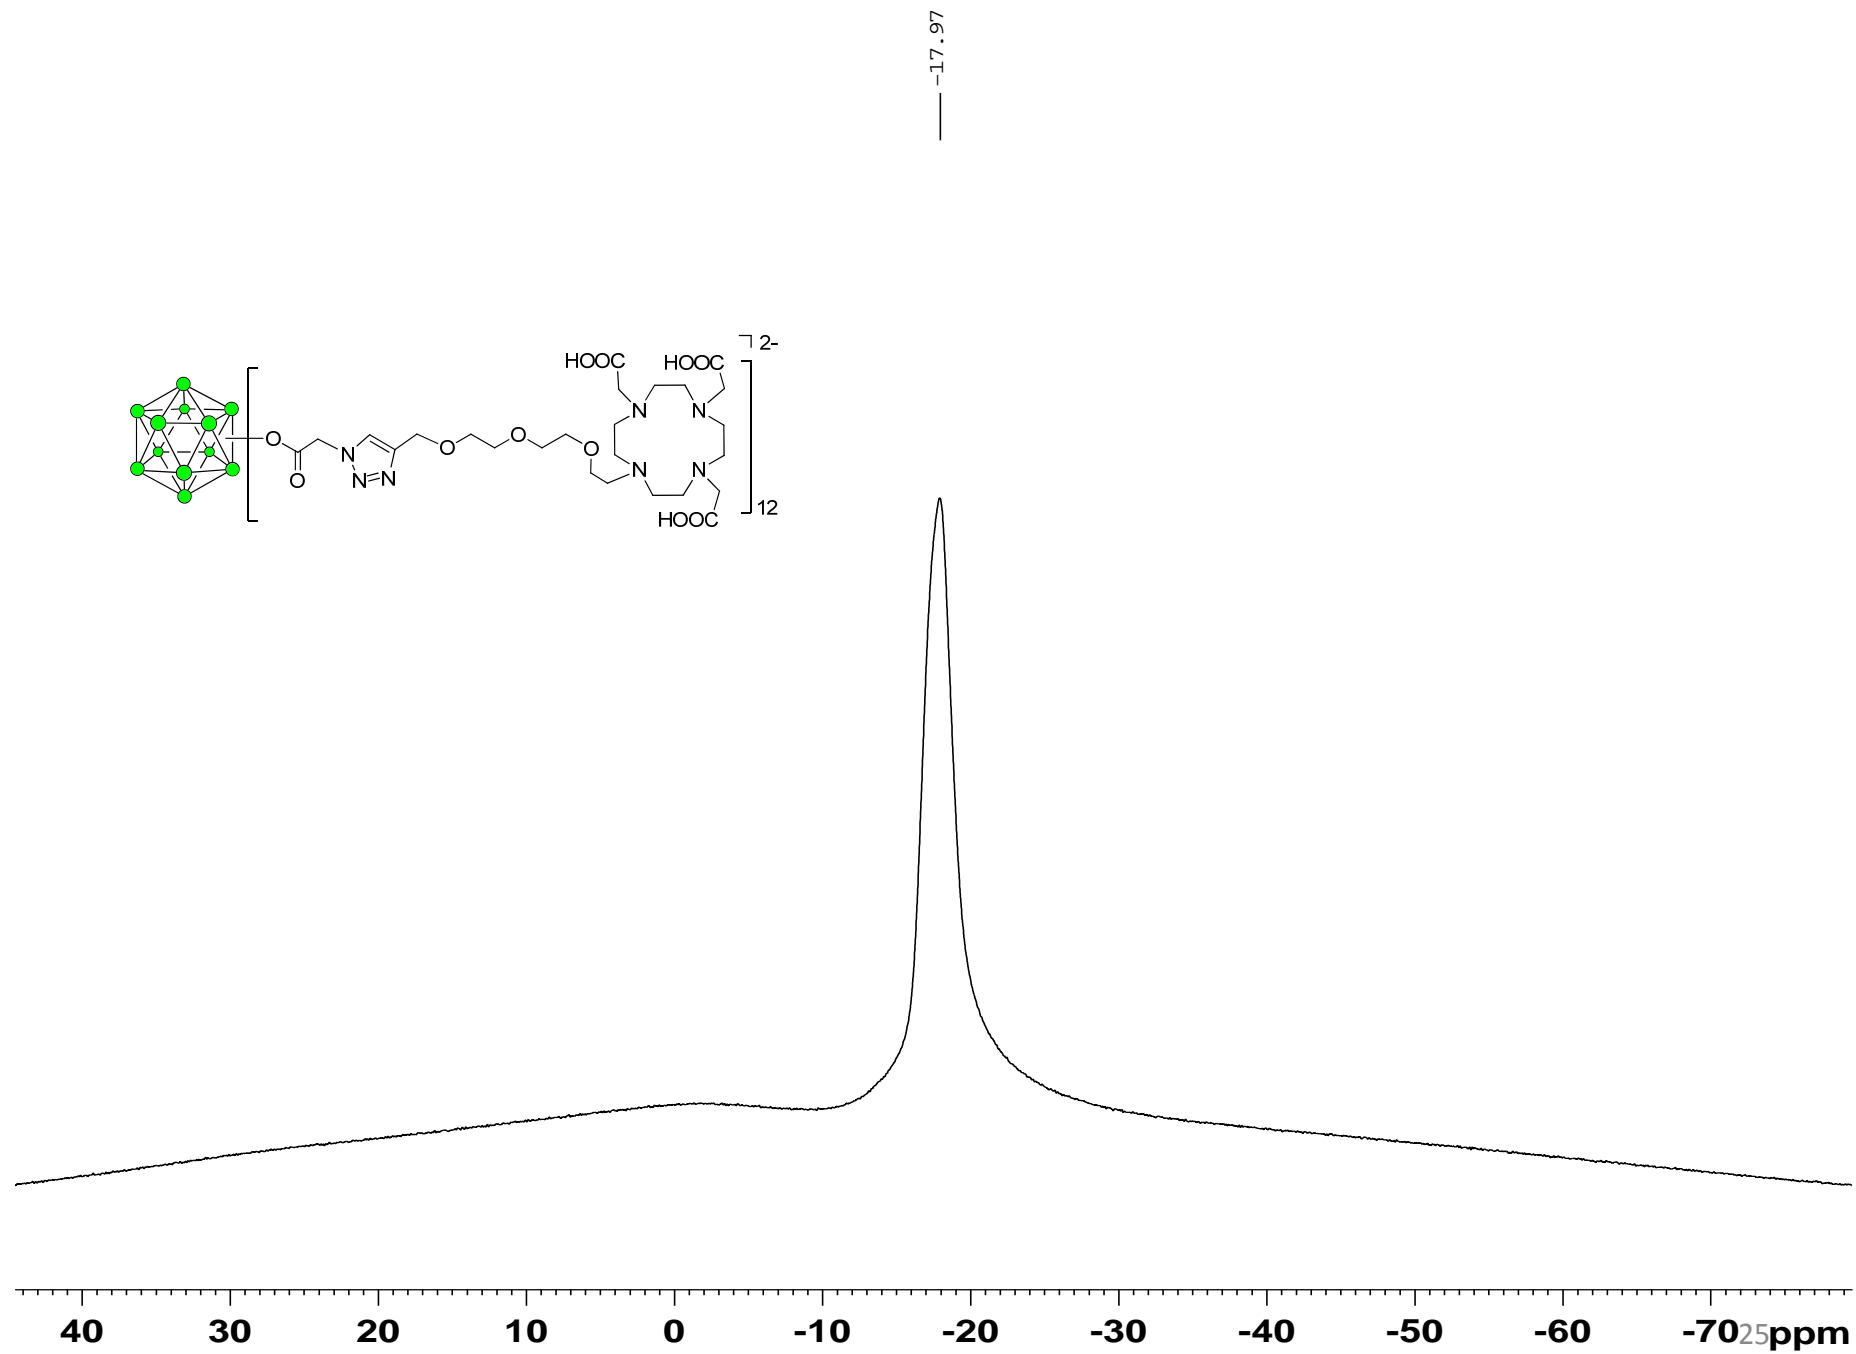

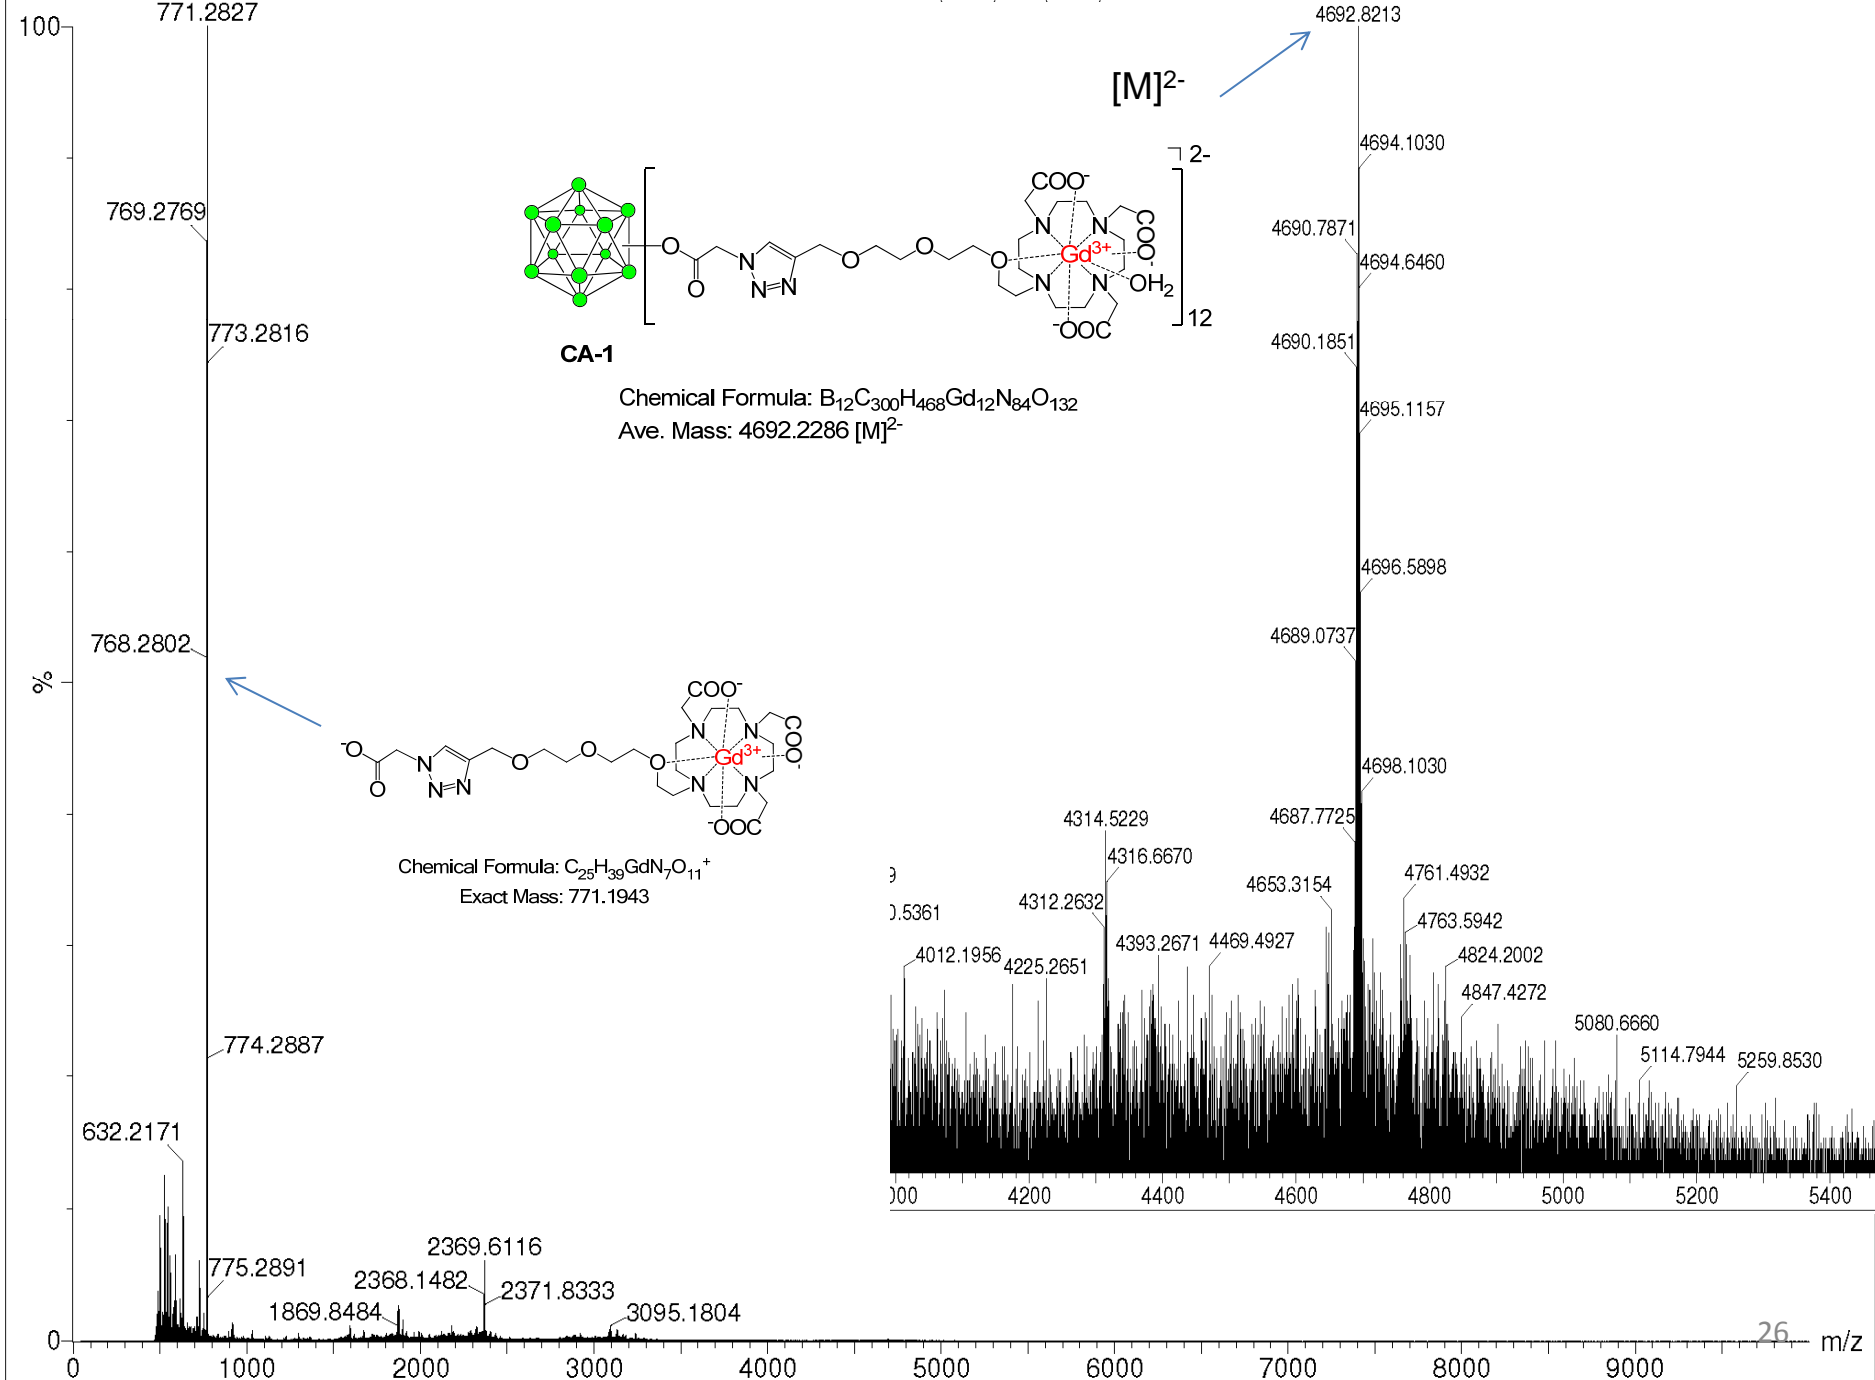

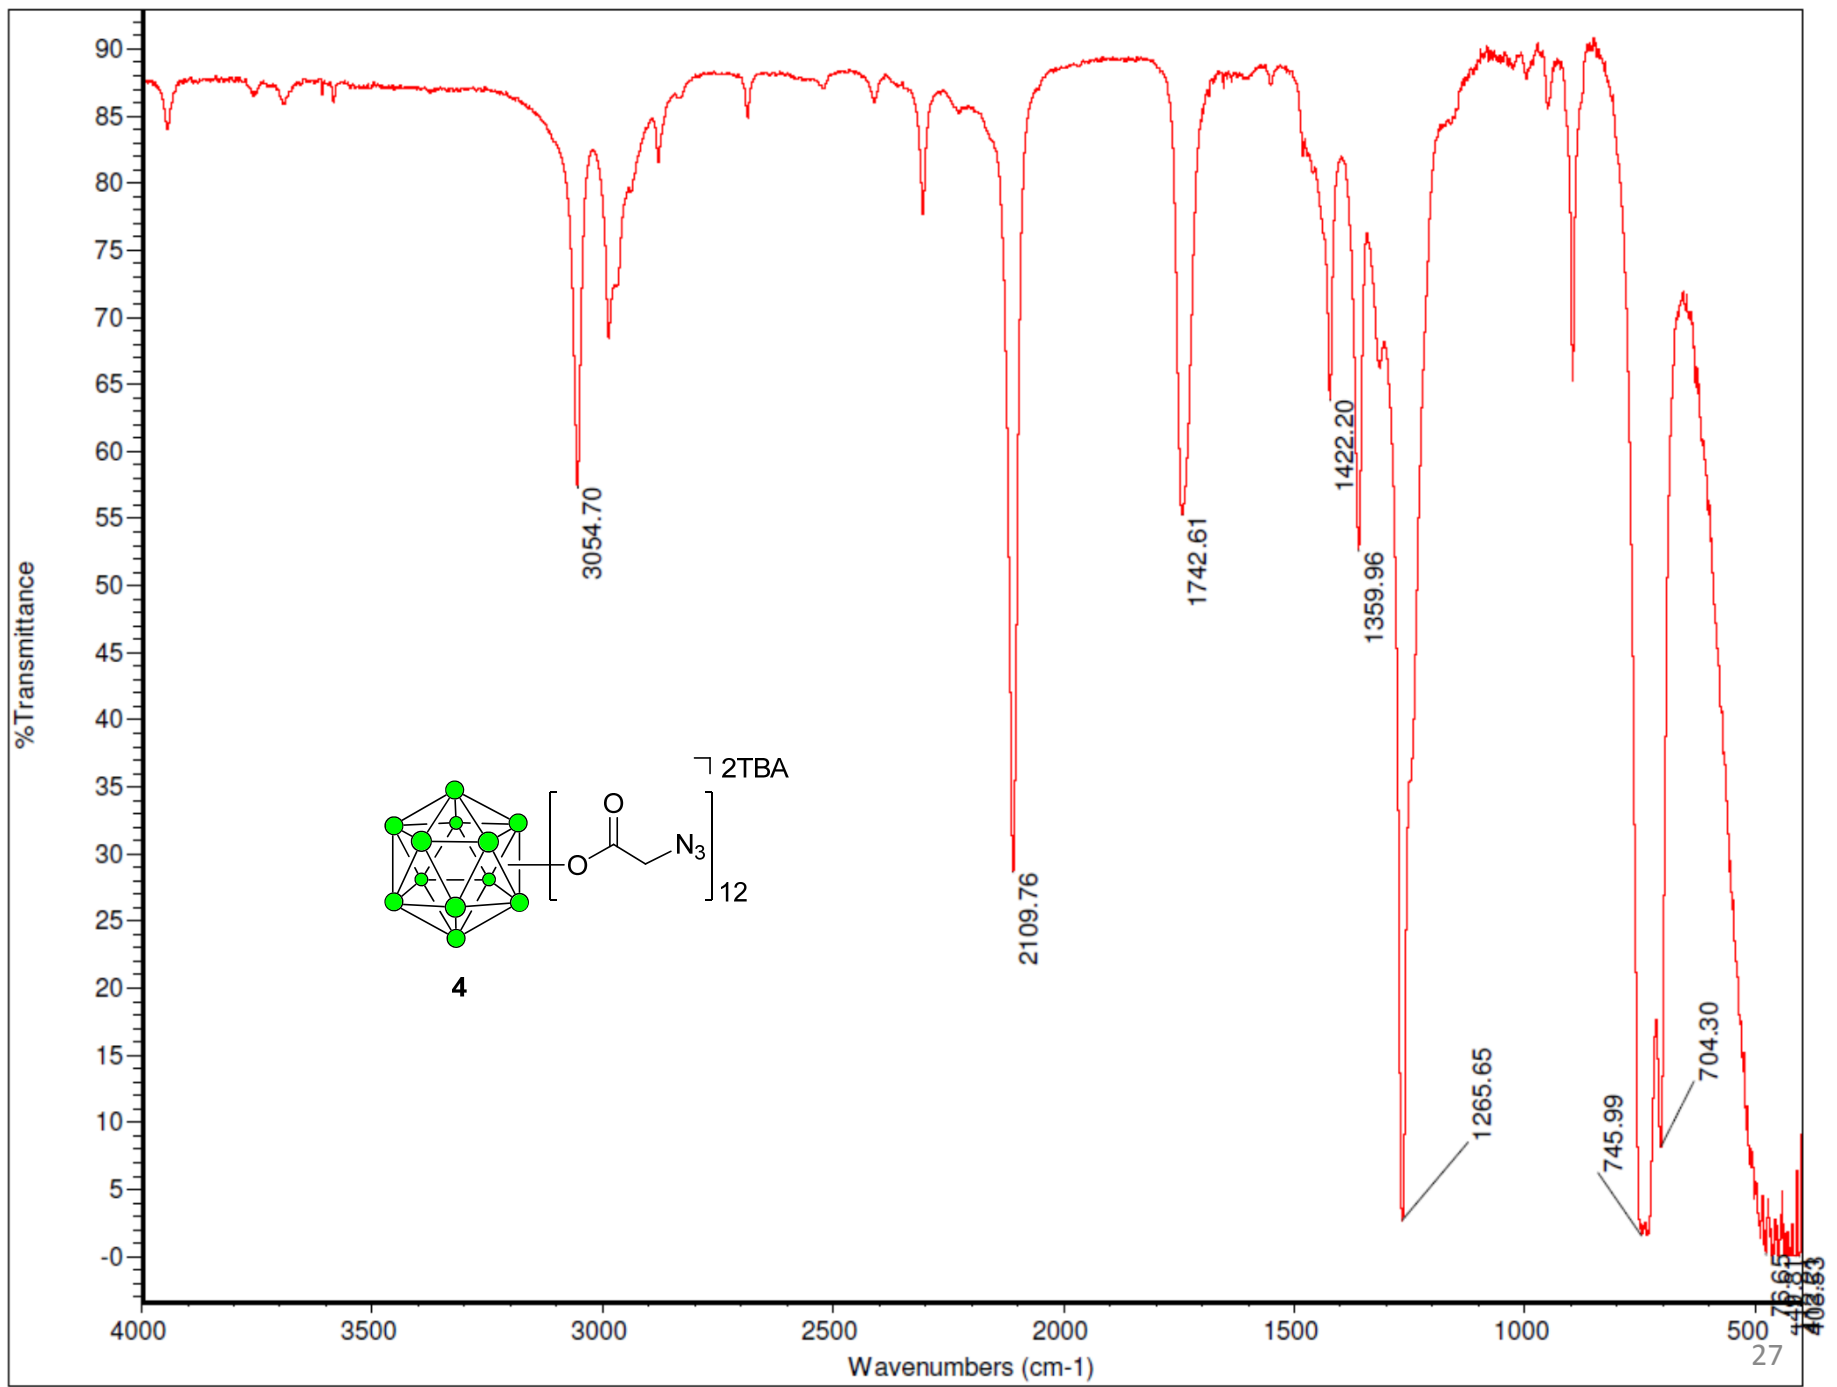

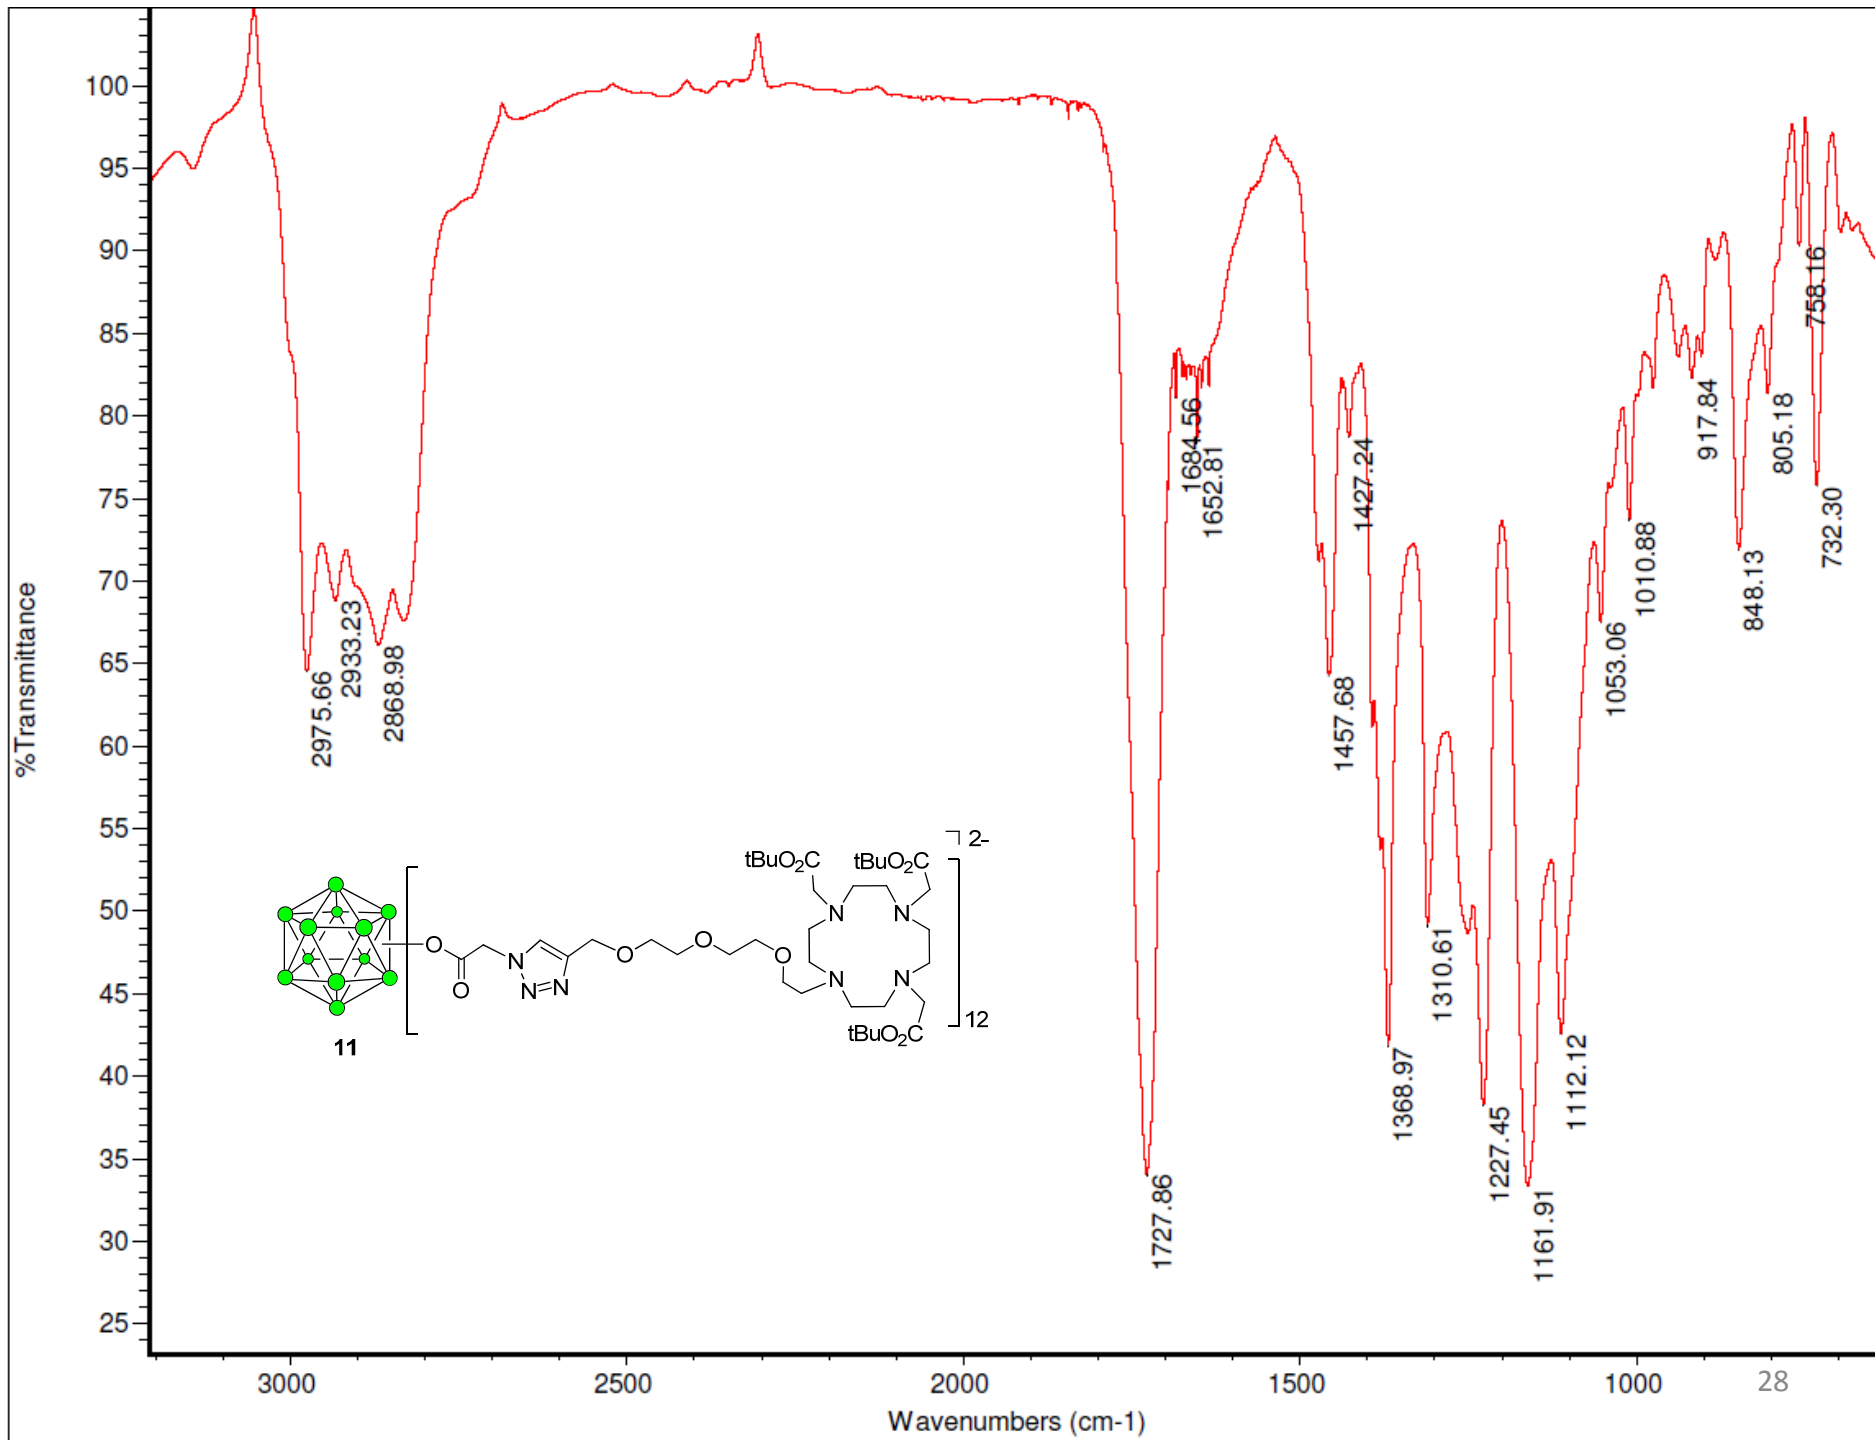

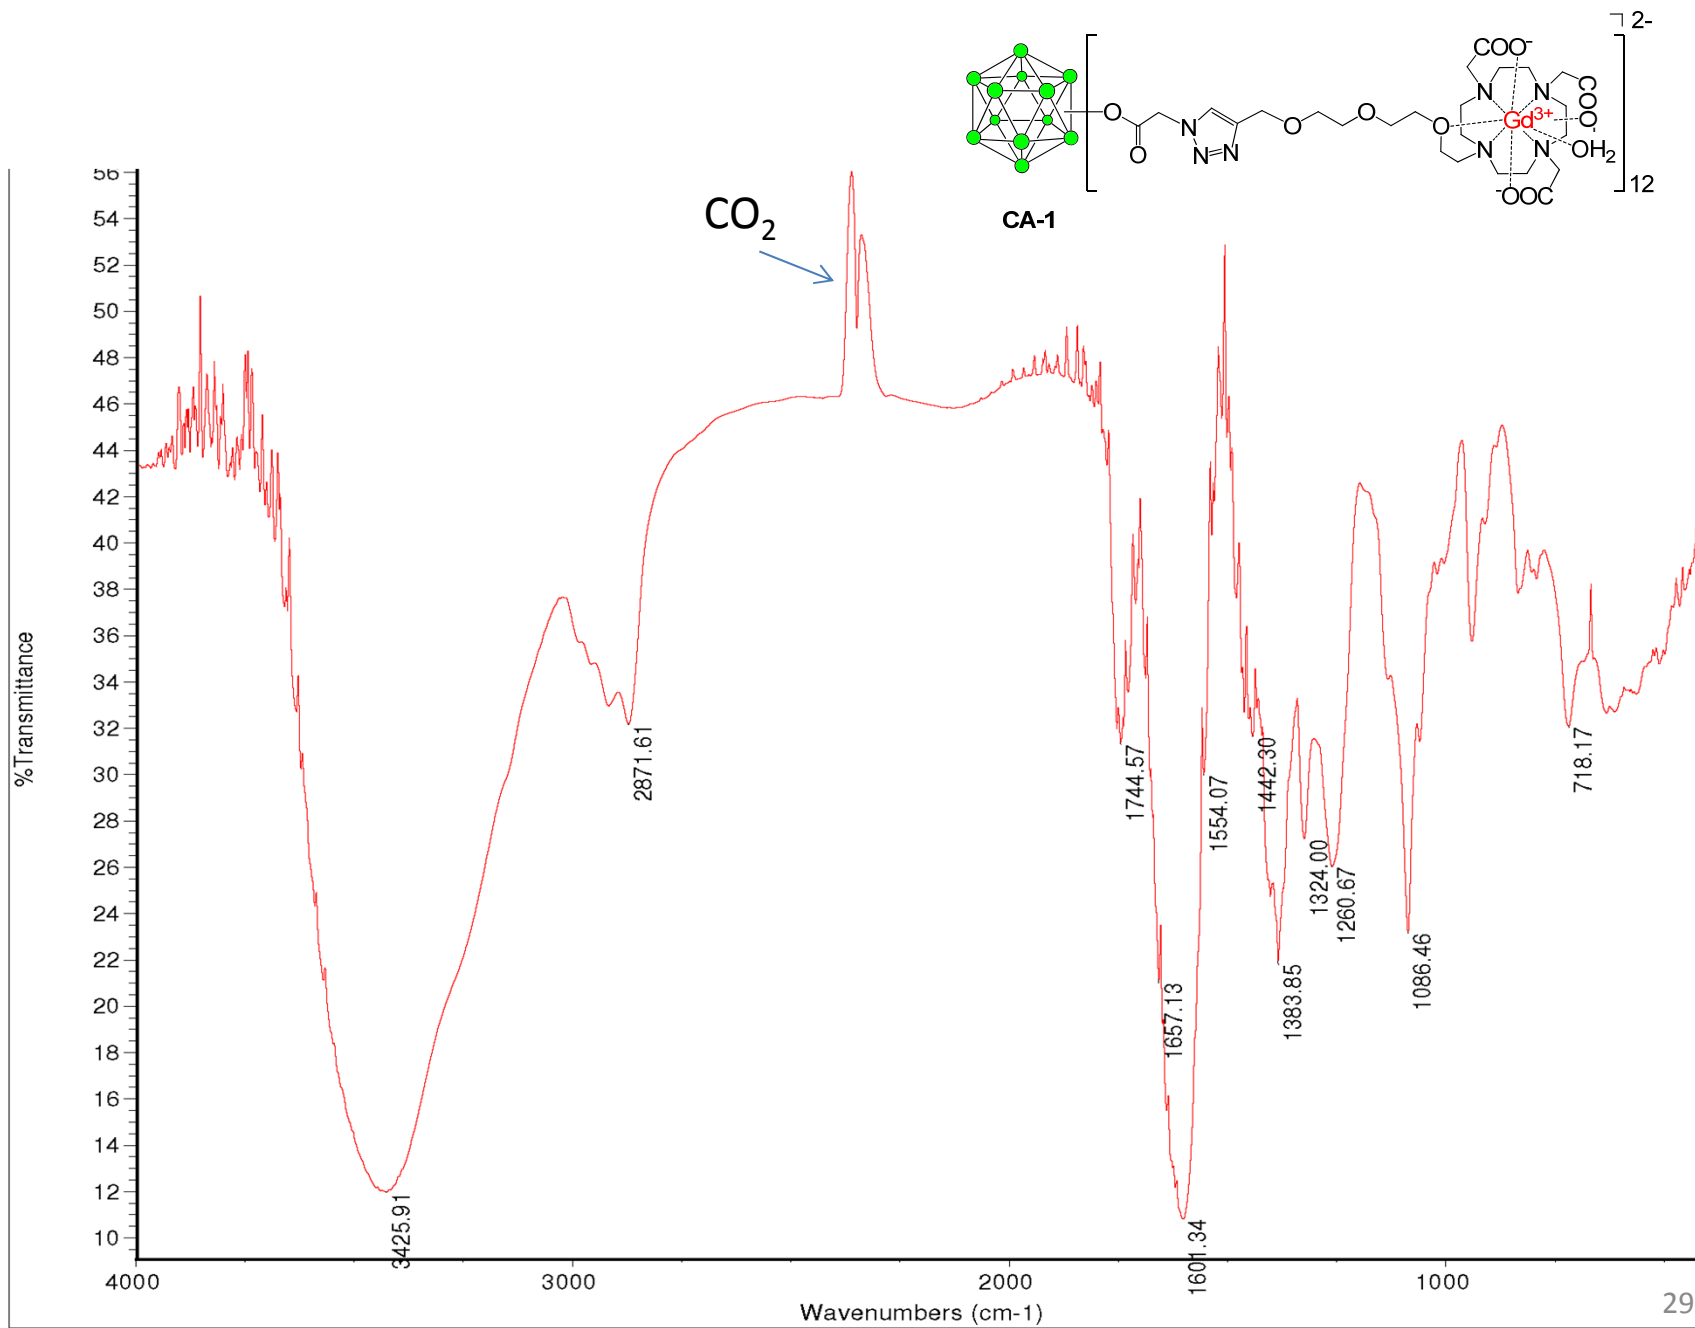

## Determination of Hydration number (q) for DO3A Dy<sup>3+</sup> complex **10**

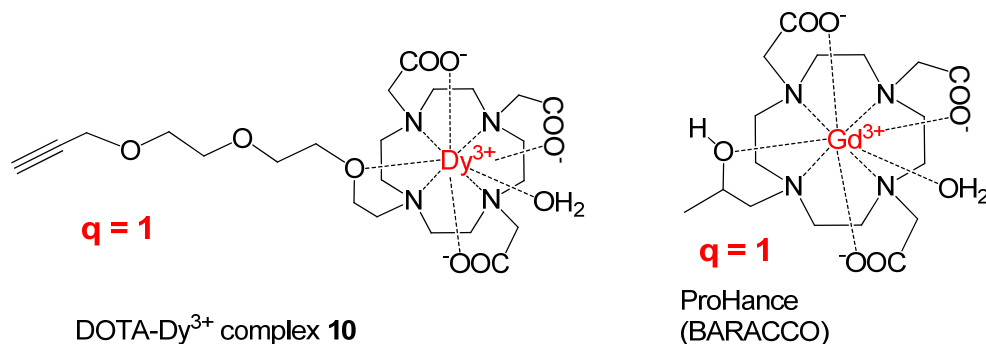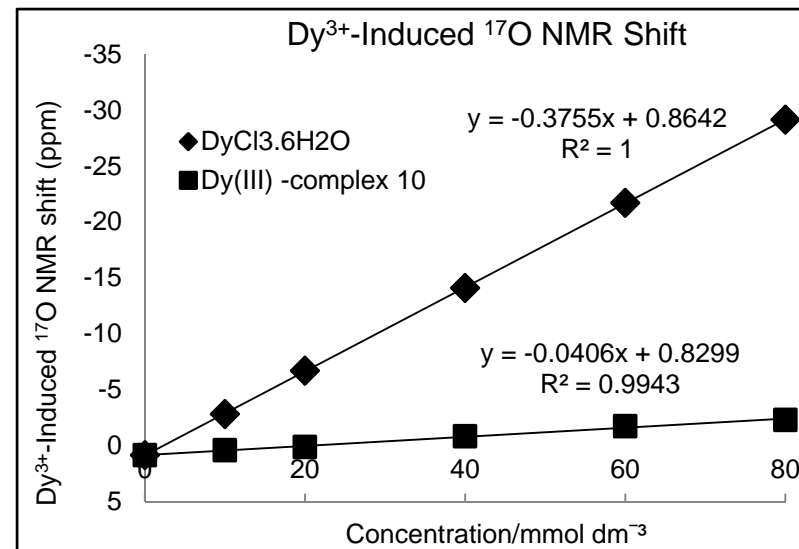

Varying concentrations of **10** and DyCl<sub>3</sub>·6H<sub>2</sub>O over the range 10-80 mmol dm<sup>-3</sup> were prepared in 80% D<sub>2</sub>O-H<sub>2</sub>O and the pH of the solutions was adjusted to pH 7.0. The <sup>17</sup>O NMR experiments were performed at 400 MHz using a Bruker Avance instrument at RT with the deuterium signal locked. A graph was plotted between the d.i.s. ( $\Delta\delta$ ) and the concentration for both **10** and the DyCl<sub>3</sub>·6H<sub>2</sub>O solutions and slope was obtained. The  $\Delta\delta$  value for a complex with the general formula, Dy(ligand)<sub>n</sub>(H<sub>2</sub>O)<sub>q</sub>, is given by the following relation;

$$(\Delta\delta) = q\Delta[\text{Dy}(\text{ligand})_n(\text{H}_2\text{O})_q]/[\text{H}_2\text{O}] \quad (I)$$

The slope of a plot of the d.i.s. versus the Dy<sup>3+</sup> concentration is proportional to the **q** value of the complex (Figure). The **q** value was obtained by linearly fitting the  $\Delta\delta$  value and was found to be 2 for complex **10**.

From the graph, which fit well to a straight line, the slope was calculated. From relation I, the slope of the graph can be equated with the following;

$$\text{Slope} = q\Delta/[\text{H}_2\text{O}],$$

From the graph, the slope was calculated as,

$$\text{Slope} = -375 \text{ ppm dm}^3 \text{ mol}^{-1} \text{ or,}$$

$$q\Delta/[\text{H}_2\text{O}] = -375 \text{ ppm dm}^3 \text{ mol}^{-1}$$

For DyCl<sub>3</sub>, the value of **q** was assumed to be 9, because the coordination number of Dy(III) in such complexes known to be 9. Hence, the value of  $\Delta/[\text{H}_2\text{O}]$  is calculated as follows:

$$\Delta/[\text{H}_2\text{O}] = -375 \text{ ppm dm}^3 \text{ mol}^{-1} / 9 \text{ or}$$

$$\Delta/[\text{H}_2\text{O}] = -41.7 \text{ ppm dm}^3 \text{ mol}^{-1}$$

From this calculation, a value of **q** for the DOTA-Dy<sup>3+</sup> complex **10** is calculated as follows:

$$\text{For complex } \mathbf{10}, \text{ Slope} = q\Delta/[\text{H}_2\text{O}], \text{ or}$$

$$q = \text{slope}/(\Delta/[\text{H}_2\text{O}]) \text{ or } q = -40.6/-41.7, \text{ hence}$$

$$q = 1$$

**Figure.** Comparison of the per-Gd  $r_1$  values of **CA-1**, ligand **9** and Omniscan.

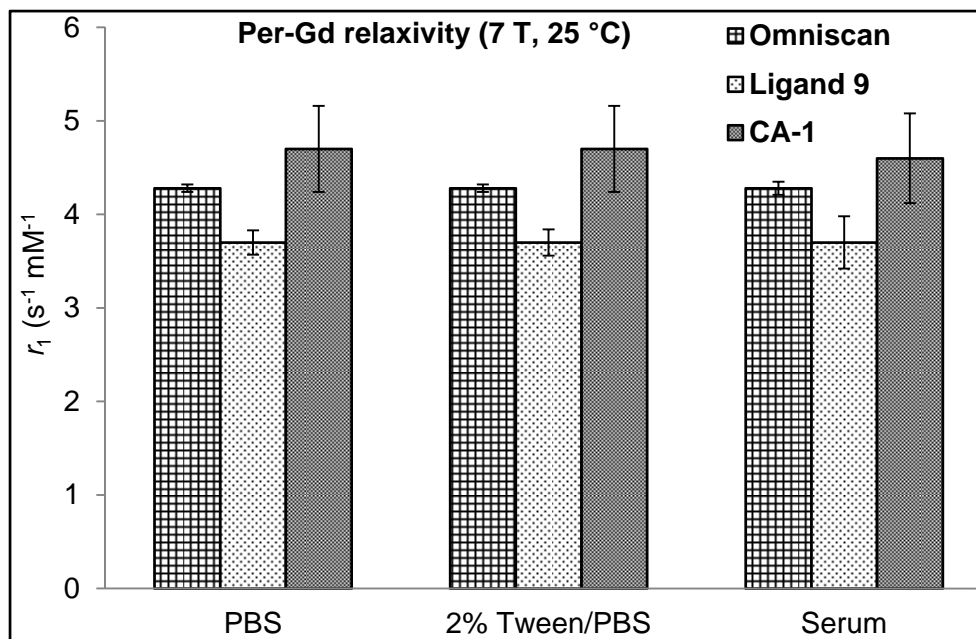

# Dynamic Light Scattering Analysis of CA-1

1mM solutions;

Standard: Gold nanoparticles (20 nm)

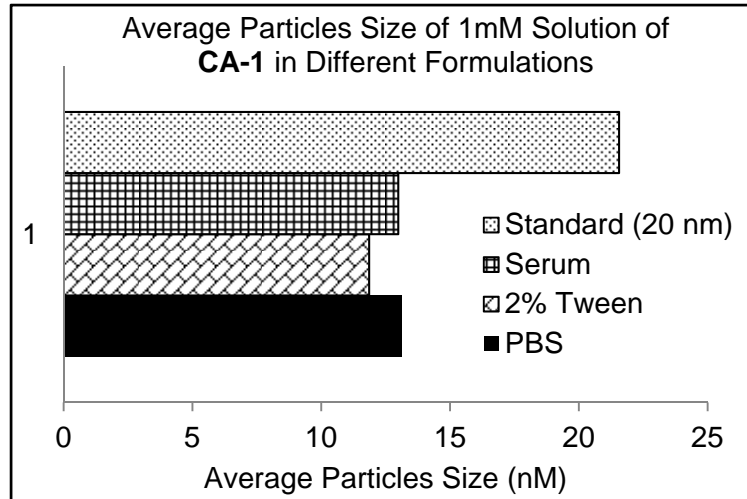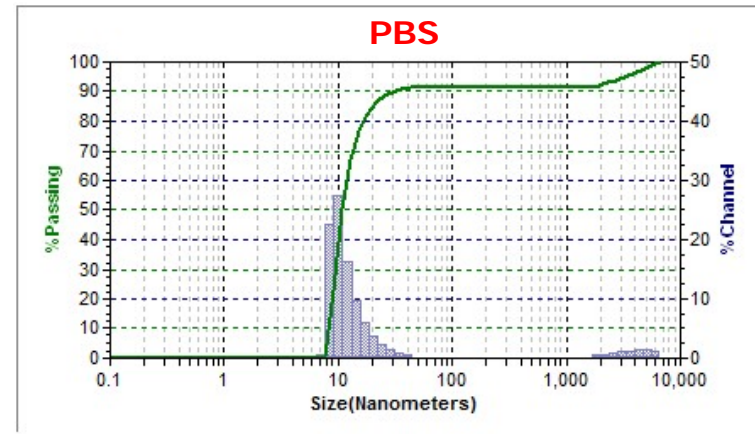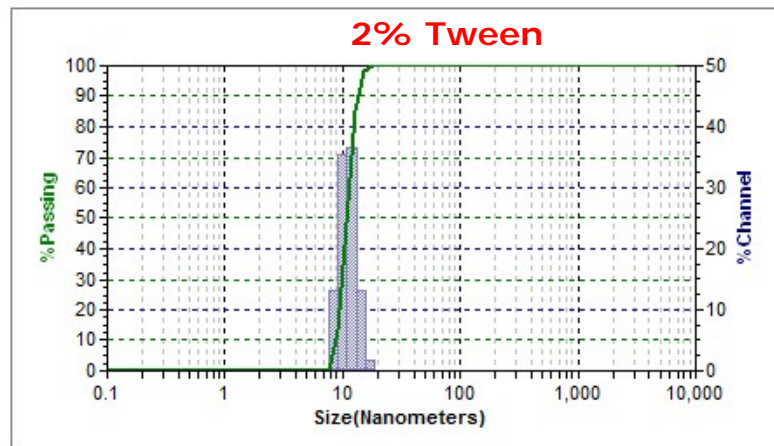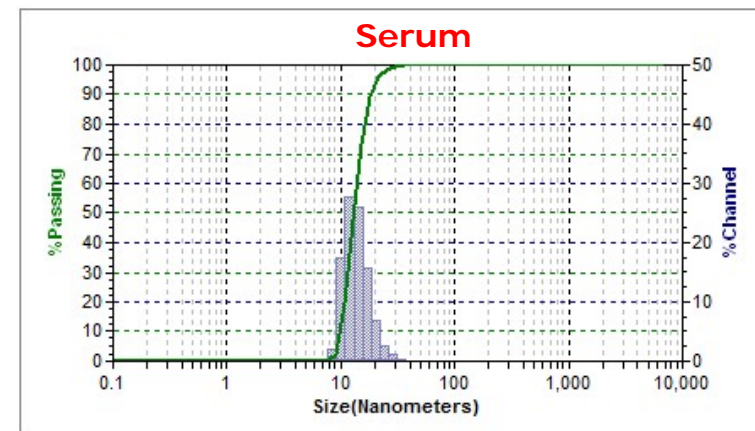



# SE-HPLC analysis of CA-1

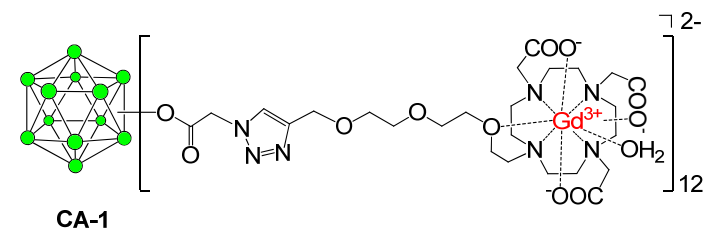

- **Column:**
  - BioSep-SEC-S2000 (Phenomenex)
  - 250 X 2.0mm
- **Mobile phase:**
  - PBS, pH 6.6
  - Flow rate: 0.1 ml/min
- **Detector:**
  - UV-256 nm
- **Injection:**
  - 5.0 mg/ml PBS stock solution
  - 5ul injection

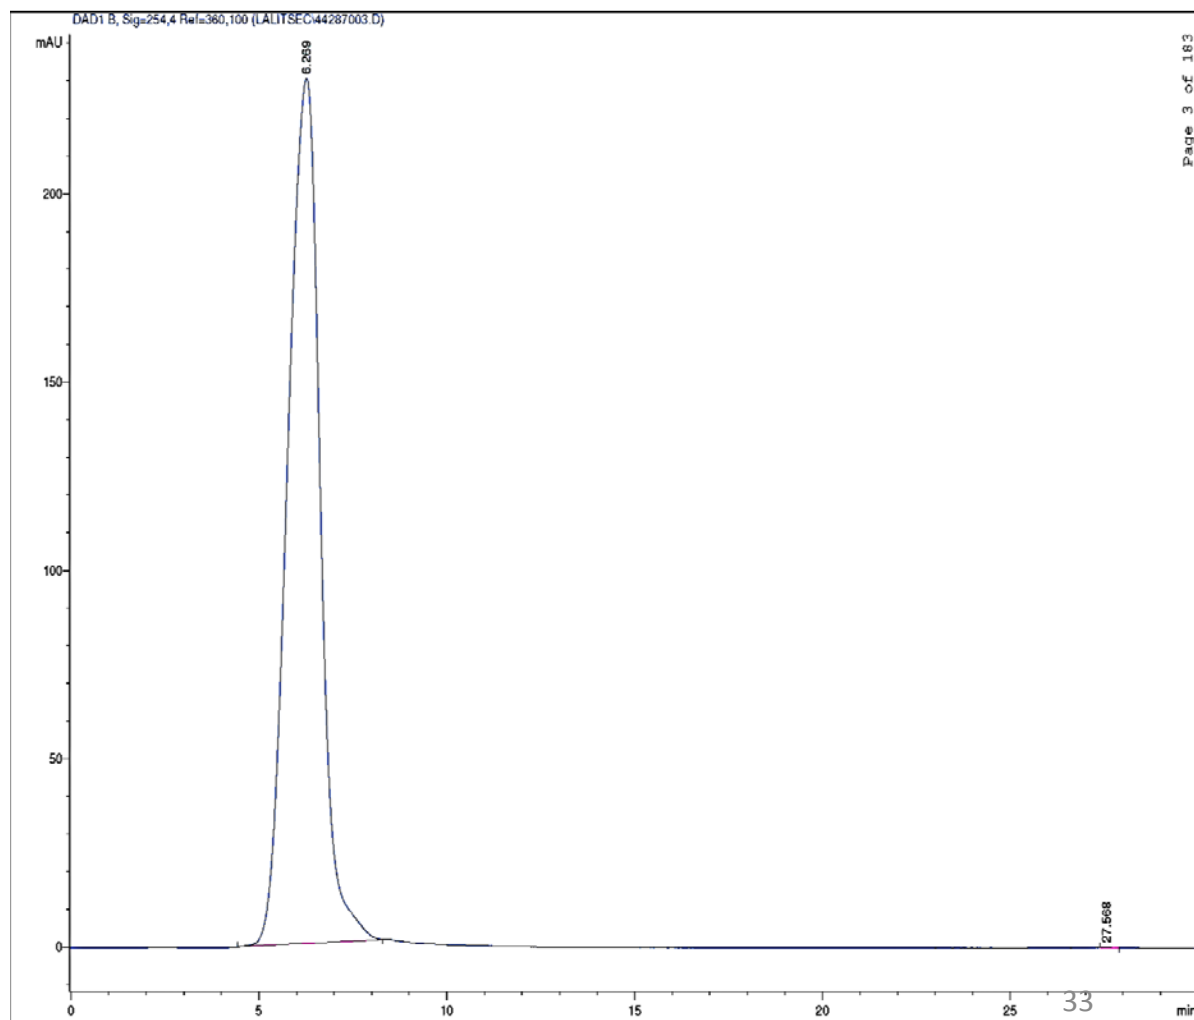

Supplement: molecules-18-09034-s001.pdf [file molecules-18-09034-s001.pdf]
